# Supplementary material for: Preparing polythiophene derivative with alternating alkyl and thioalkyl side chains via Kumada coupling for efficient organic solar cells
Source: Royal Society of Chemistry journal article supplement (doi:10.1039/d1py01051d), 2021-01-01
Supplement: d1py01051d1.pdf [file d1py01051d1.pdf]

## Electronic Supplementary Information

for

### Preparing Polythiophene Derivative with Alternating Alkyl and Thioalkyl Side Chains via Kumada Coupling for Efficient Organic Solar Cells

Ziyi Xie, Qingyun Wei, Tong Shan, Xiaoyang Zheng, Yi Zhang and Hongliang Zhong\*

School of Chemistry and Chemical Engineering, Shanghai Key Lab of Electrical Insulation and Thermal Aging, Shanghai Jiao Tong University, Shanghai 200240, China

E-mail: hlzhong@sjtu.edu.cn

#### General procedure

All reactions were carried out under argon atmosphere, the solvents and reagents were used as commercially supplied.  $^1\text{H}$  NMR spectra were collected on a Bruker AV-400 (400 MHz) spectrometers. The number-average ( $M_n$ ) and weight-average ( $M_w$ ) molecular weights were determined by Shimadzu-20A GPC running in chlorobenzene at 80 °C, using one PL mixed B column which is calibrated against narrow polydispersity polystyrene standards. The theoretical calculation was performed by density functional theory (DFT) at B3LYP/6-31G level. The absorption spectra were measured by a PerkinElmer Lambda 750S recording spectrophotometer. Cyclic voltammetry (CV) measurements of these products were conducted on a CHI660D voltammetry analyzer in acetonitrile solution with 0.1 M tetrabutylammonium hexafluorophosphate ( $n\text{-Bu}_4\text{NPF}_6$ ) as supporting electrolyte at room temperature via conventional three-electrode configuration, consisting of a ITO glass (coated with polymers) as working electrode, an Ag/AgCl wire as reference electrode and a platinum sheet as counter electrode. The ferrocene (HOMO: -4.8 eV) was used as in internal reference. Grazing-incidence wide-angle x-ray scattering (GIWAXS) characterizations were carried out at the beamline 14B1 of Shanghai Synchrotron Radiation Facility (SSRF).

#### Device Fabrication

The Indium tin oxide (ITO)-coated glass substrates were pre-cleaned by sequential ultra-sonication in deionized water, acetone and isopropanol for 30 min each. After 20 min of ultraviolet-ozone treatment, a thin layer of 15 nm thick PEDOT-PSS was spin-coated onto the substrates as the anode interlayer and annealed at 150 °C for 15 min.

Subsequently, the substrates were transferred into the nitrogen-filled glove box. Then the active layer solutions with donor/acceptor (D/A) weight ratio of 1:1 in chlorobenzene at a concentration of  $8 \text{ mg}\cdot\text{mL}^{-1}$  were spin-coated on the PEDOT-PSS layer to form around 100 nm thick active layer, followed with thermal annealing at  $110 \text{ }^\circ\text{C}$  for 10 min. Then PDINO solution in methanol ( $1 \text{ mg}\cdot\text{mL}^{-1}$ ) was spin-coated on the active layer to give a 5 nm thick cathode interlayer. Finally, about 80 nm thick of Ag was deposited onto the active layer under high vacuum, giving an effective cell area of  $3.68 \text{ mm}^2$ .

### OSC device characterization

The device  $J$ - $V$  characteristics were recorded by a Keithley 2420 Source Meter unit in forward direction under AM 1.5G 1 sun irradiance ( $100 \text{ mW}\cdot\text{cm}^{-2}$ ) as generated by a 300W Xe lamp solar simulator (Enlitech SS-F5-3A) at room temperature. Standard Si diode with KG-5 filter was used to calibrate the light intensity. Enlitech EQE system (Enlitech QE-M110) with a Si diode as reference cell was used to characterize the EQE spectra. Monochromatic light was generated from an Enlitech lamp source with a monochromator.

### Charge carrier mobility measurement.

Hole-only diode configuration: ITO/PEDOT-PSS/active layers/ $\text{MoO}_3$ /Ag. Electron-only diode configuration: ITO/ $\text{ZnO}$ /active layers/PDINO/Ag. PEDOT-PSS,  $\text{MoO}_3$ ,  $\text{ZnO}$  and Ag were deposited by the same route as OSCs devices. The thickness was 104, 101 and 109 nm for P3HT, P3SHT and PTST based blend films, respectively. The mobility in active layers were determined by fitting the dark current hole/electron-only diodes to the space-charge limited current (SCLC) model. The mobility was determined by the equation:

$$J = \frac{9\varepsilon_0\varepsilon_r\mu_0V^2}{8L^3}$$

where  $J$  was current density,  $\mu_0$  was the hole or electron mobility,  $\varepsilon_r$  was the dielectric permittivity of the active layer (generally taken to be about 3 for organic materials),  $\varepsilon_0$  was the dielectric permittivity of free space ( $\varepsilon_0 = 8.854187817 \times 10^{-12} \text{ F/m}$ ),  $L$  was the film thickness, and  $V$  was the voltage, which was defined as  $V = V_{\text{appl}} - V_{\text{bi}}$ , where  $V_{\text{appl}}$  was the applied voltage,  $V_{\text{bi}}$  was the built-in voltage.

### Synthesis

All chemicals and reagents were used as received from commercial sources without further purification. Solvents for chemical synthesis were purified according to standard procedures. The compounds **1** and **2** were prepared according to reported methods in literatures<sup>1, 2</sup>.

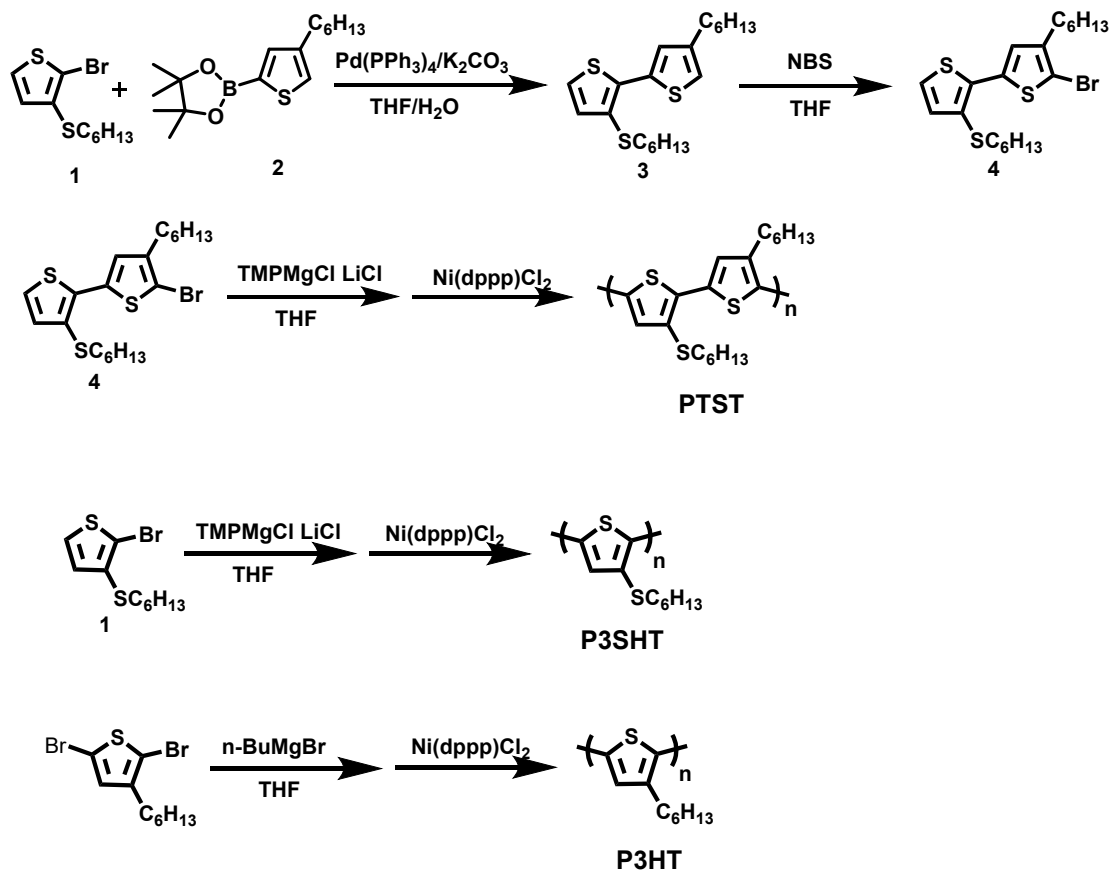

**Scheme S1.** The synthetic routes of PTST, P3SHT and P3HT.

#### The synthesis of compound 3

In a dry flask, compound **1** (268 mg, 0.96 mmol) and compound **2** (282 mg, 0.96 mmol) were added, then Pd (PPh<sub>3</sub>)<sub>4</sub> (55 mg, 5% mol) and K<sub>2</sub>CO<sub>3</sub> (663 mg, 4.80 mmol) were added under argon, followed by the addition of THF (20 mL) and H<sub>2</sub>O (5 mL). After being stirred at 80 °C overnight, the mixture was cooled to room temperature and extracted by hexane. The organic phase was dried over Na<sub>2</sub>SO<sub>4</sub> and then the solvent was removed with rotary evaporator. The crude product was purified by column chromatography on silica gel with hexane as eluent to afford the product (285 mg, 0.78 mmol, 81% yield) as colorless oil. <sup>1</sup>H NMR (400 MHz, CDCl<sub>3</sub>) δ 7.20 (s, 1H), 7.15 (d, 1H), 7.02 (d, 1H), 6.90 (s, 1H), 2.87 - 2.80 (t, 2H), 2.63 - 2.55 (t, 2H), 1.69 - 1.54 (m, 4H), 1.45 - 1.20 (m, 12H), 0.94 - 0.82 (m, 6H); <sup>13</sup>C NMR (100 MHz, CDCl<sub>3</sub>) δ 143.16, 135.98, 135.13, 131.99, 127.60, 127.58, 122.87, 120.68, 36.02, 31.71, 31.38, 30.45, 30.42, 29.56, 29.03, 28.42, 22.65, 22.55, 14.13, 14.04.

#### The synthesis of compound 4

Compound **3** (285mg, 0.78mmol) was dissolved in anhydrous THF (10 mL) in a three-neck flask and stirred under argon. After cooling the solution to -20 °C, N-bromosuccinimide (139 mg, 0.78 mol) was added dropwise. Then the mixture was allowed to be back to room temperature slowly and kept stirring for 10 h. The mixture was quenched by Na<sub>2</sub>SO<sub>3</sub> aqueous solution and extracted by hexane, then washed two

times each with brine, and dried over  $\text{Na}_2\text{SO}_4$ . The solvent was evaporated, and the product was purified by column chromatography on silica gel with hexane as eluent to afford the product (287 mg, 0.65 mmol, 83% yield).  $^1\text{H NMR}$  (400 MHz,  $\text{CDCl}_3$ )  $\delta$  7.15 (d, 1H), 7.02 (s, 1H), 7.00 (d, 1H), 2.87 - 2.68 (t, 2H), 2.59 - 2.49 (t, 2H), 1.65 - 1.53 (m, 4H), 1.45 - 1.19 (m, 12H), 0.92-0.82 (m, 6H);  $^{13}\text{C NMR}$  (100 MHz,  $\text{CDCl}_3$ )  $\delta$  141.66, 136.04, 135.06, 132.38, 127.83, 126.63, 123.03, 110.23, 36.32, 31.64, 31.36, 29.67, 29.57, 29.47, 28.93, 28.40, 22.62, 22.55, 14.12, 14.03.

#### The synthesis of polymer **PTST**

Compound **4** (253 mg, 0.57 mmol) was dissolved in anhydrous THF (10 mL) in a dry flask and stirred under argon. After cooling to 0 °C, 12,2,6,6-tetramethylpiperidinylmagnesium chloride - lithium chloride complex solution (0.60 mL, 1 M in THF) was added dropwise, and the mixture was stirred for 1 h. The solution was then heated up to 35 °C followed by the addition of  $\text{Ni}(\text{dppp})\text{Cl}_2$  catalyst (8.13 mg, 0.015 mmol). The combined mixture was stirred at 50 °C for 5 h. The deep red solution was then cooled to room temperature, quenched with 1 mL HCl (5 M), and precipitated into methanol. The product was purified by Soxhlet extraction using methanol, THF and chloroform. The fraction in chloroform was precipitated in methanol and recovered as dark purple solid (46 mg, 19%). PTST can be completely dissolved in chlorobenzene and chloroform when heated to 60 °C.  $^1\text{H NMR}$  (400 MHz,  $\text{CDCl}_3$ )  $\delta$  7.24 (s, 1H), 7.10 (s, 1H), 2.97 - 2.87 (m, 2H), 2.85 - 2.74 (m, 2H), 1.76 - 1.62 (m, 4H), 1.48 - 1.15 (m, 12H), 0.95 - 0.83 (m, 6H). GPC (PTST):  $M_n = 17.5 \text{ kg}\cdot\text{mol}^{-1}$ ,  $M_w = 30.6 \text{ kg}\cdot\text{mol}^{-1}$ ,  $\text{Đ} = 1.75$ .

#### The synthesis of polymer **P3SHT**

The polymer **P3SHT** was prepared following the similar method for **PTST**.

$^1\text{H NMR}$  (400 MHz,  $\text{CDCl}_3$ )  $\delta$  7.38 (m, 1H), 2.94 (m, 2H), 1.76 - 1.15 (m, 8H), 0.99 - 0.84 (m, 3H). GPC (P3SHT):  $M_n = 16.2 \text{ kg}\cdot\text{mol}^{-1}$ ,  $M_w = 32.4 \text{ kg}\cdot\text{mol}^{-1}$ ,  $\text{Đ} = 2.01$ .

#### The synthesis of **P3HT**

The 2,5-dibromo-3-hexyl thiophene (489 mg, 1.5 mmol) was dissolved in 8 mL THF under argon. To this solution, butylmagnesium bromide (1.5 mL, 1.0 M in THF) was added dropwise at 0 °C and then the solution was kept stirring for 1 h. The mixture was heated to reflux, followed by the addition of  $\text{Ni}(\text{dppp})\text{Cl}_2$  (8 mg, 0.015 mmol). After keeping reflux for 4 hours, the mixture was poured into 100 mL methanol. The solid was collected and Soxhlet extracted by methanol, THF and chloroform. The fraction in chloroform solution was recovered as purple solid (169 mg, 1.0 mmol, yield: 67%).

$^1\text{H NMR}$  (400 MHz,  $\text{CDCl}_3$ )  $\delta$  6.98 (br, 1H), 2.89 - 2.71 (m, 2H), 1.77 - 1.21 (m, 8H), 0.98 - 0.83 (m, 3H). GPC (P3HT):  $M_n = 16.5 \text{ kg}\cdot\text{mol}^{-1}$ ,  $M_w = 23.6 \text{ kg}\cdot\text{mol}^{-1}$ ,  $\text{Đ} = 1.43$ .

## Supplementary Figures and Tables

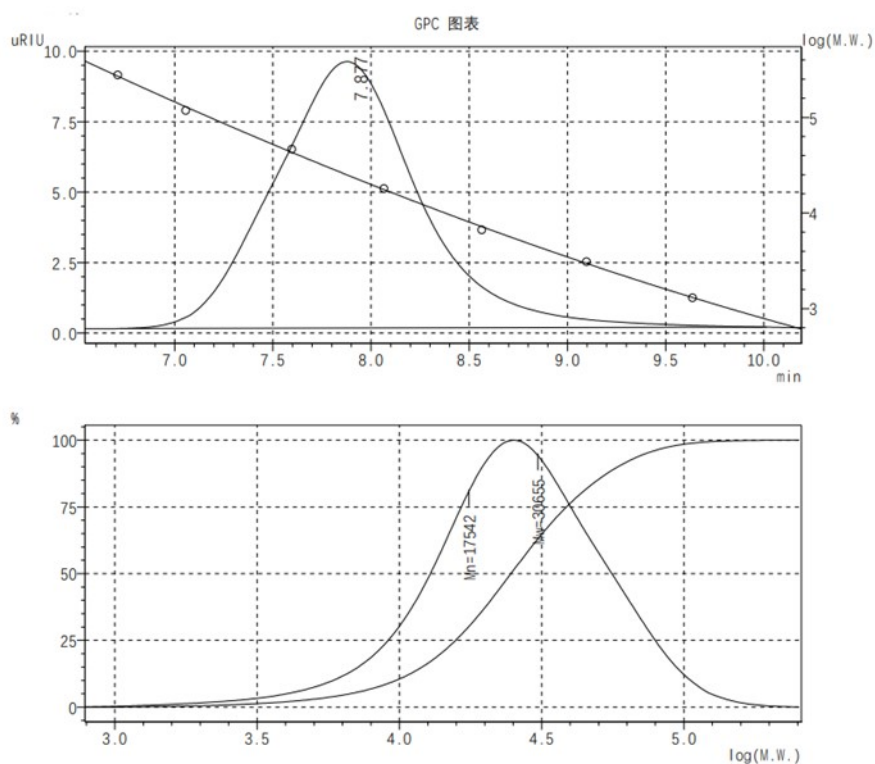

Figure S1. GPC spectra of polymer PTST.

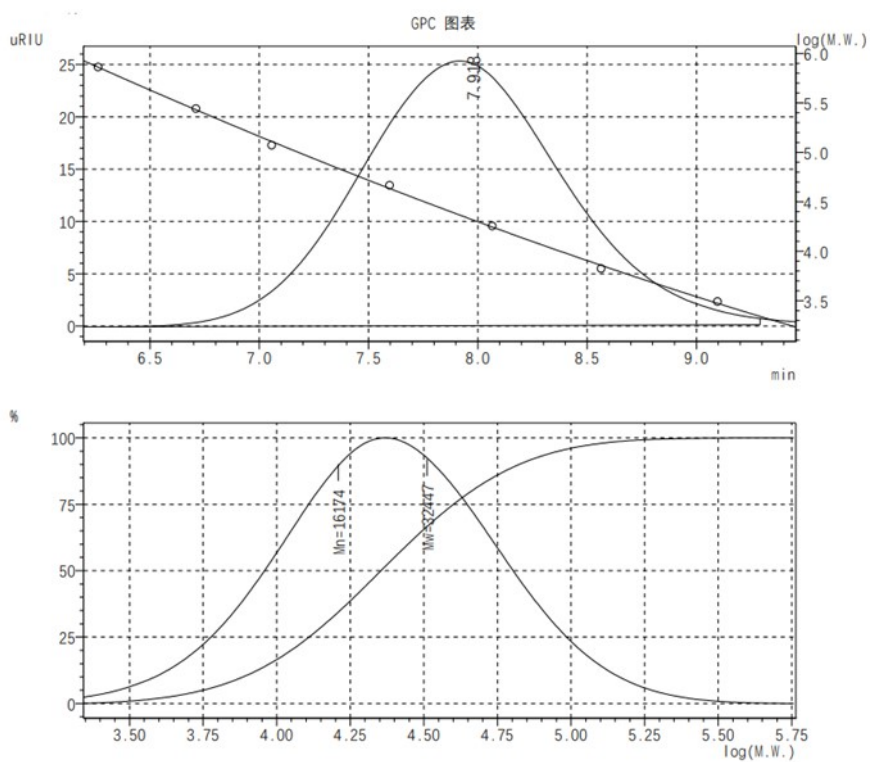

Figure S2. GPC spectra of polymer P3SHT.

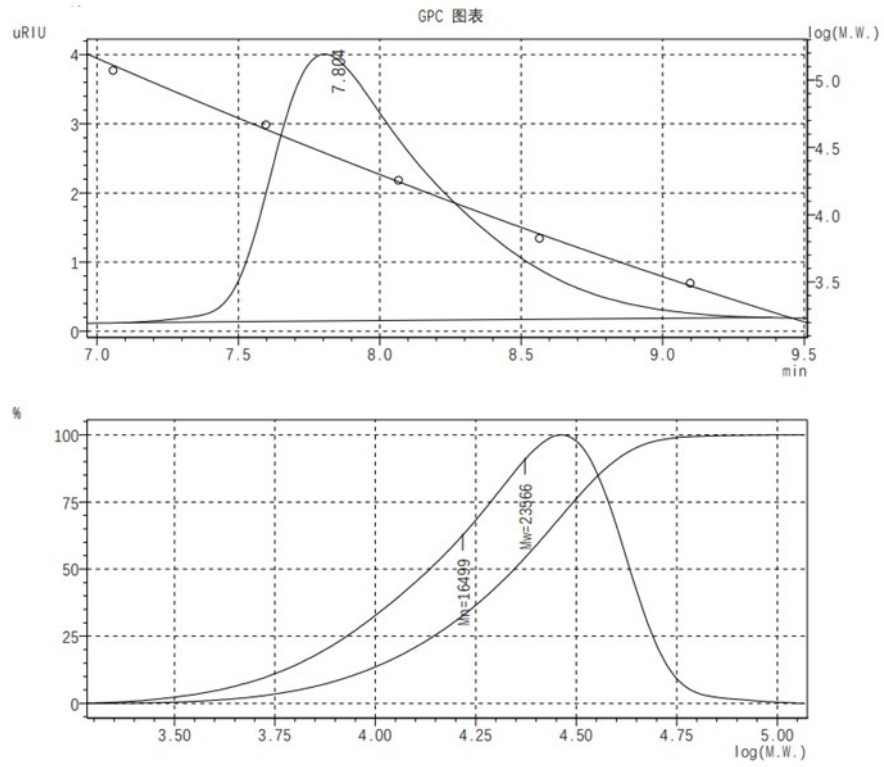

**Figure S3.** GPC spectra of polymer P3HT.

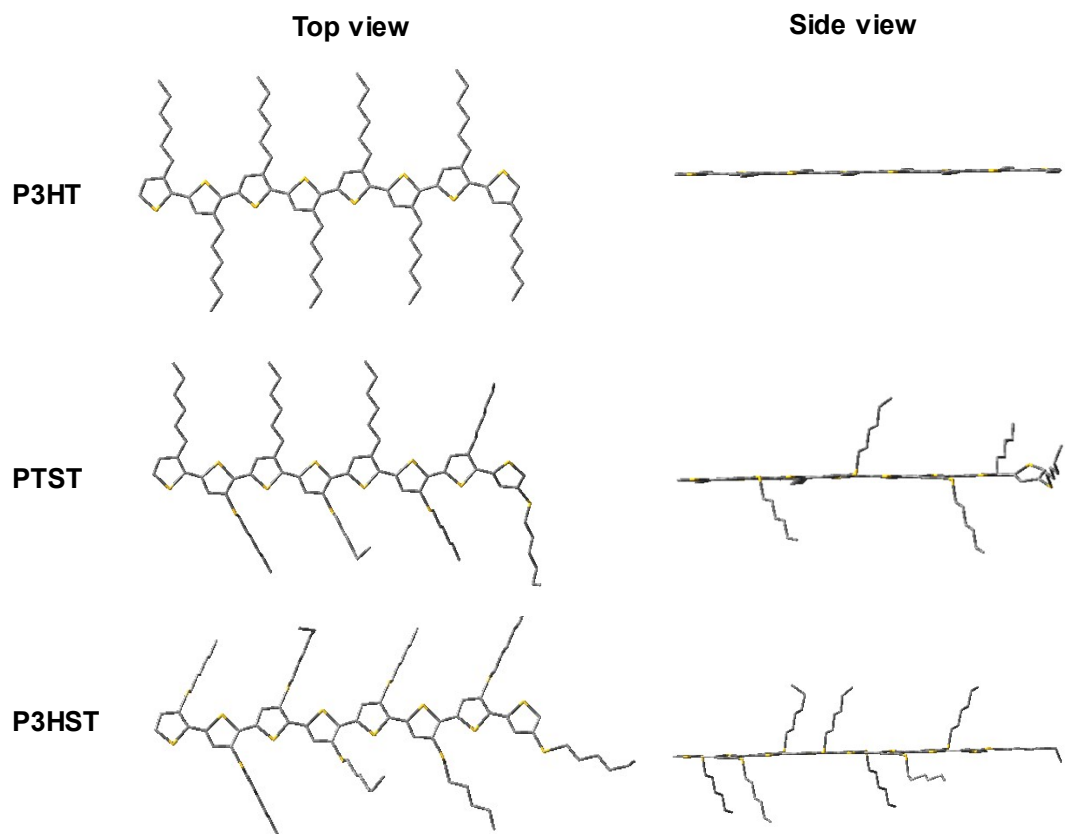

**Figure S4.** The optimized geometries of P3HT, PTST and P3HST based on density functional theory (DFT) at B3LYP/6-31G level. The hydrogen atoms are omitted for clarification.

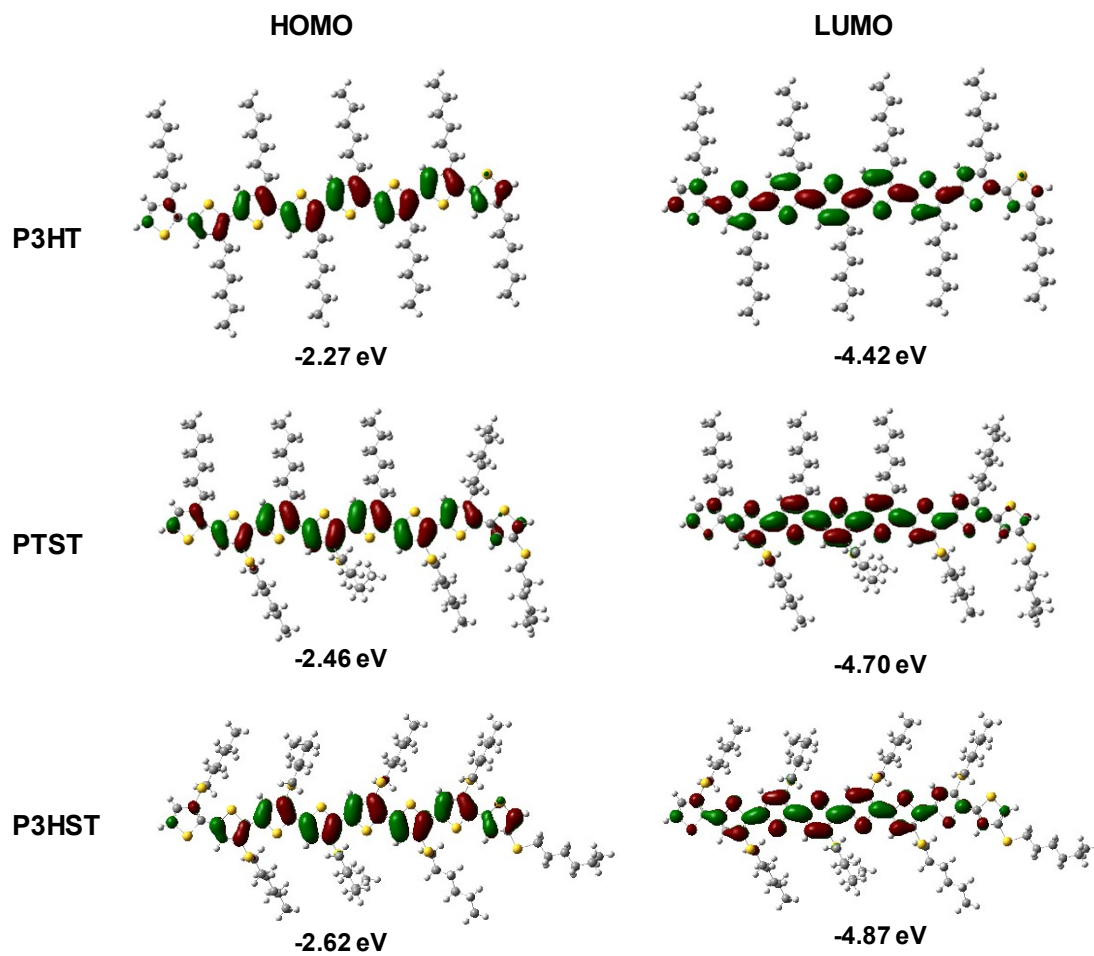

**Figure S5.** The calculated HOMO and LUMO of P3HT, PTST and P3HST based on density functional theory (DFT) at B3LYP/6-31G level.



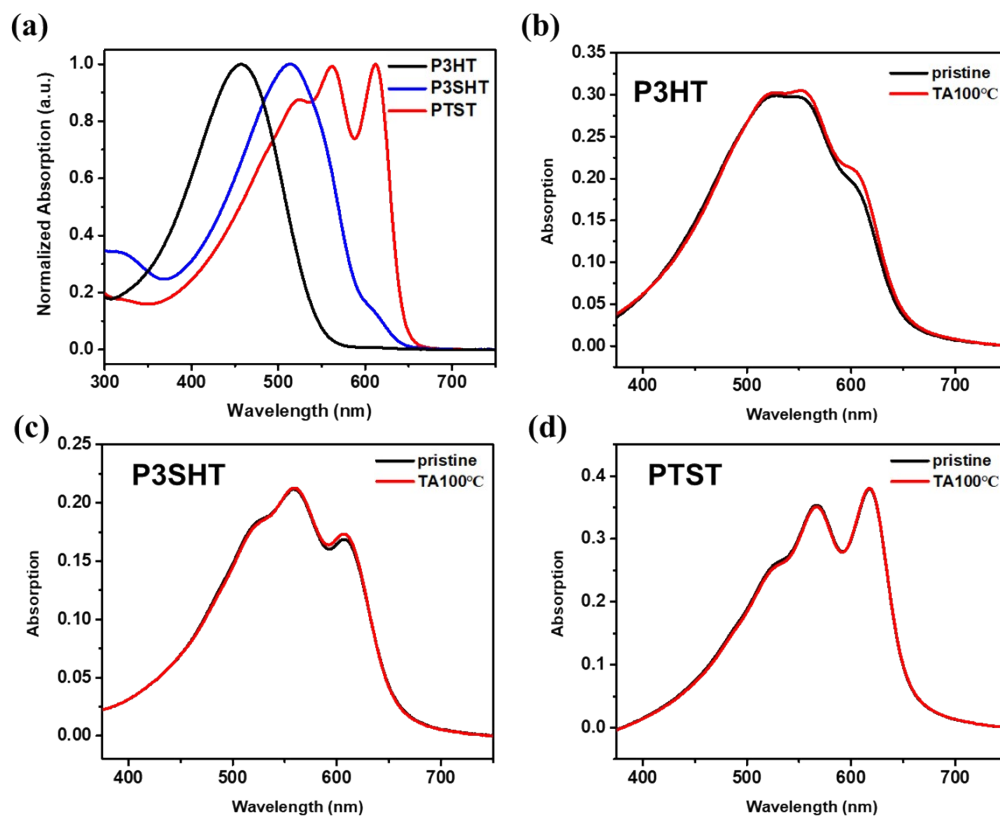

**Figure S6.** (a) Normalized UV-vis absorption spectra of P3HT, P3SHT and PTST in chlorobenzene solution. UV-vis absorption spectra of (b) P3HT, (c) P3SHT and (d) PTST films with or without thermal annealing at 100°C for 5 minutes.

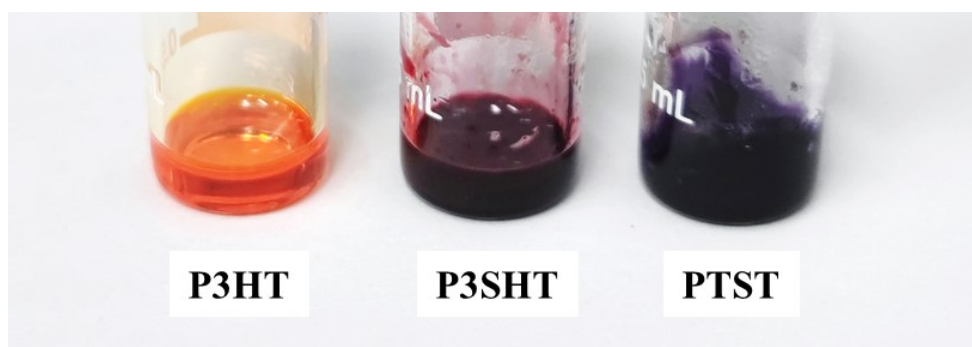

**Figure S7.** Photos of P3HT, P3SHT and PTST in chlorobenzene solution.

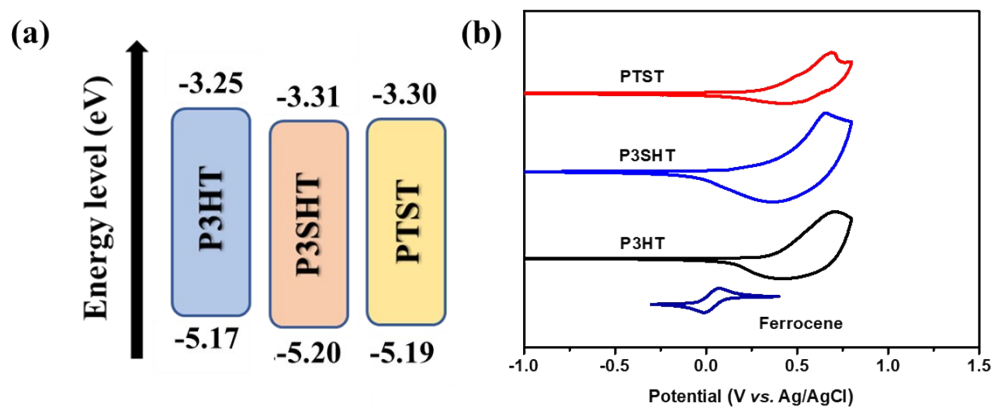

**Figure S8.** (a) Energy levels diagram and (b) cyclic voltammety curves of P3HT, P3SHT and PTST.

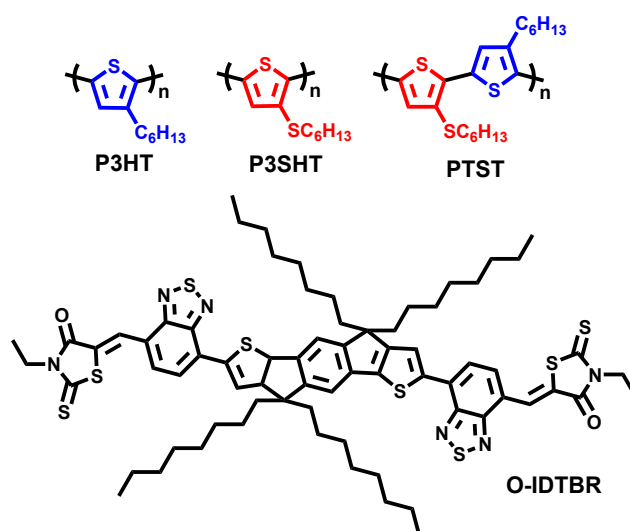

**Figure S9.** Chemical structures of P3HT, P3SHT, PTST and O-IDTBR.

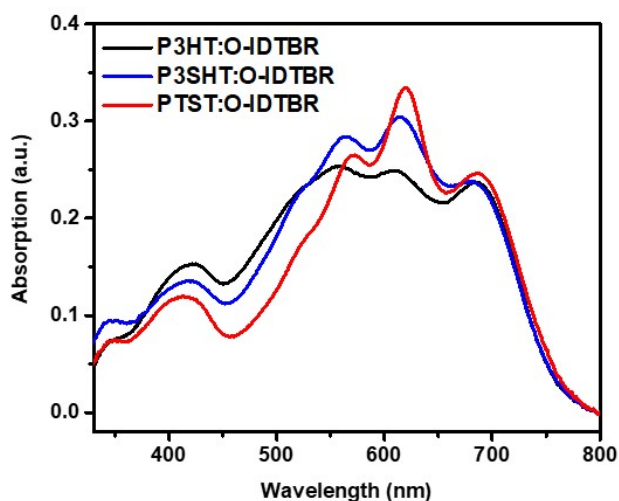

**Figure S10.** The UV-Vis absorption spectra of the optimal donor:O-IDTBR devices.

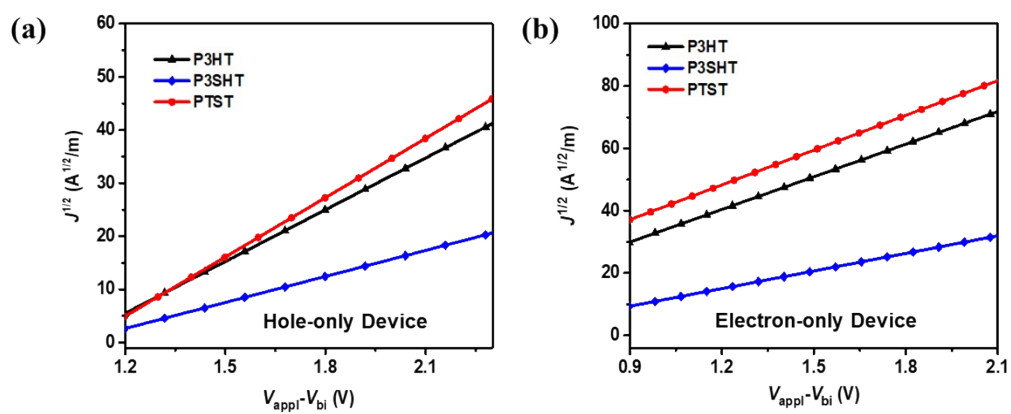

**Figure S11.**  $J^{1/2}$  -  $V$  plots of (a) hole-only and (b) electron-only devices based on donor:O-IDTBR blend film under the optimized conditions.

## NMR Characterization

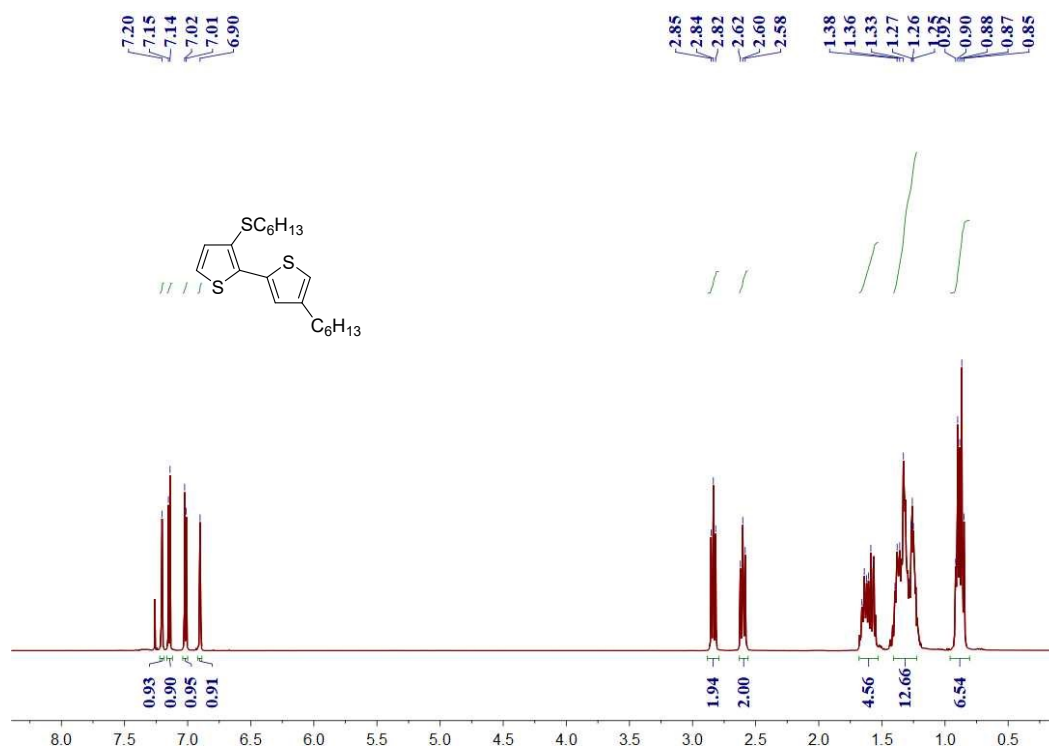

Figure S12. <sup>1</sup>H NMR spectra of compound 3.

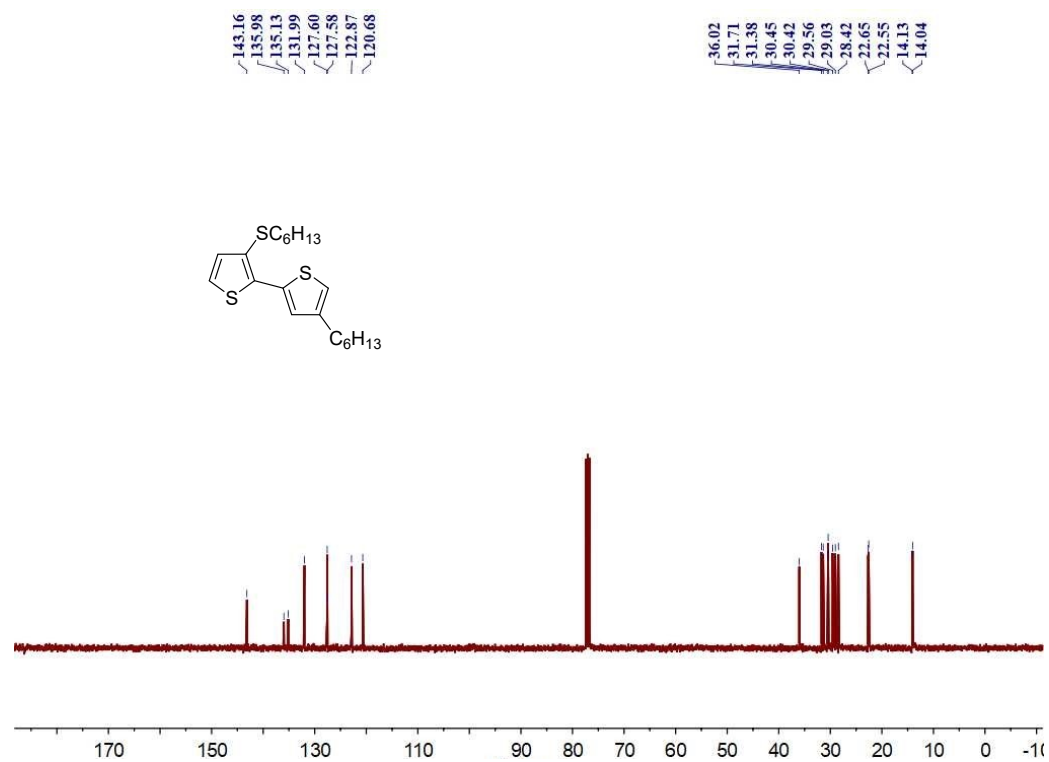

Figure S13. <sup>13</sup>C NMR spectra of compound 3.

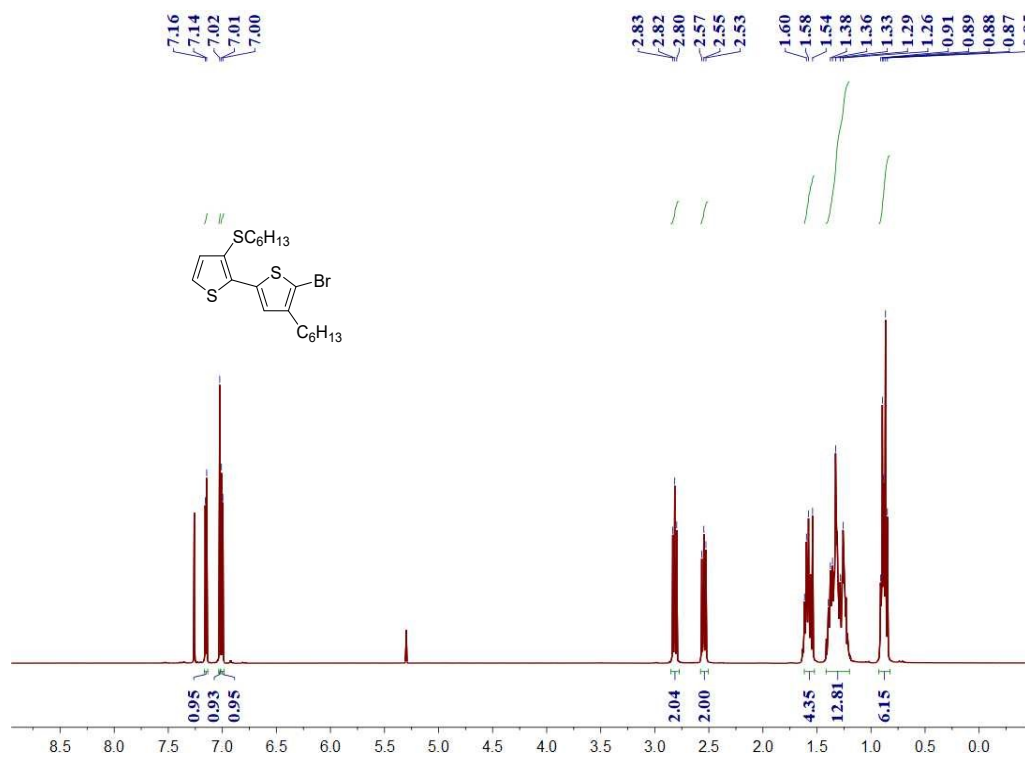

Figure S14. <sup>1</sup>H NMR spectra of compound 4.

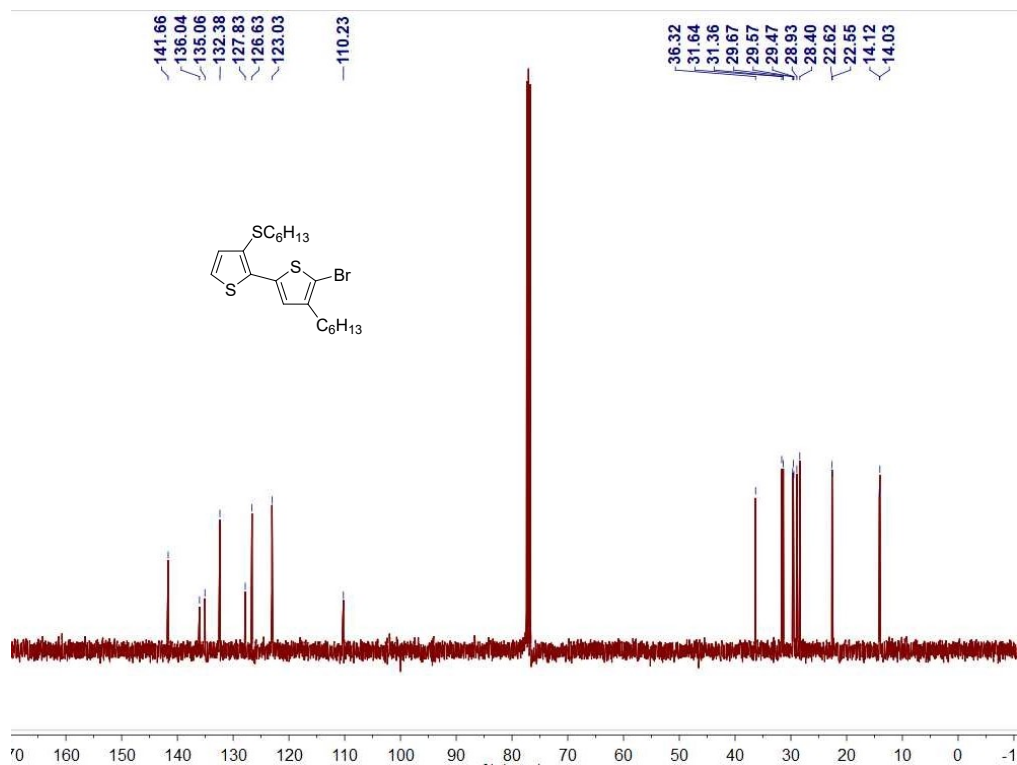

Figure S15. <sup>13</sup>C NMR spectra of compound 4.

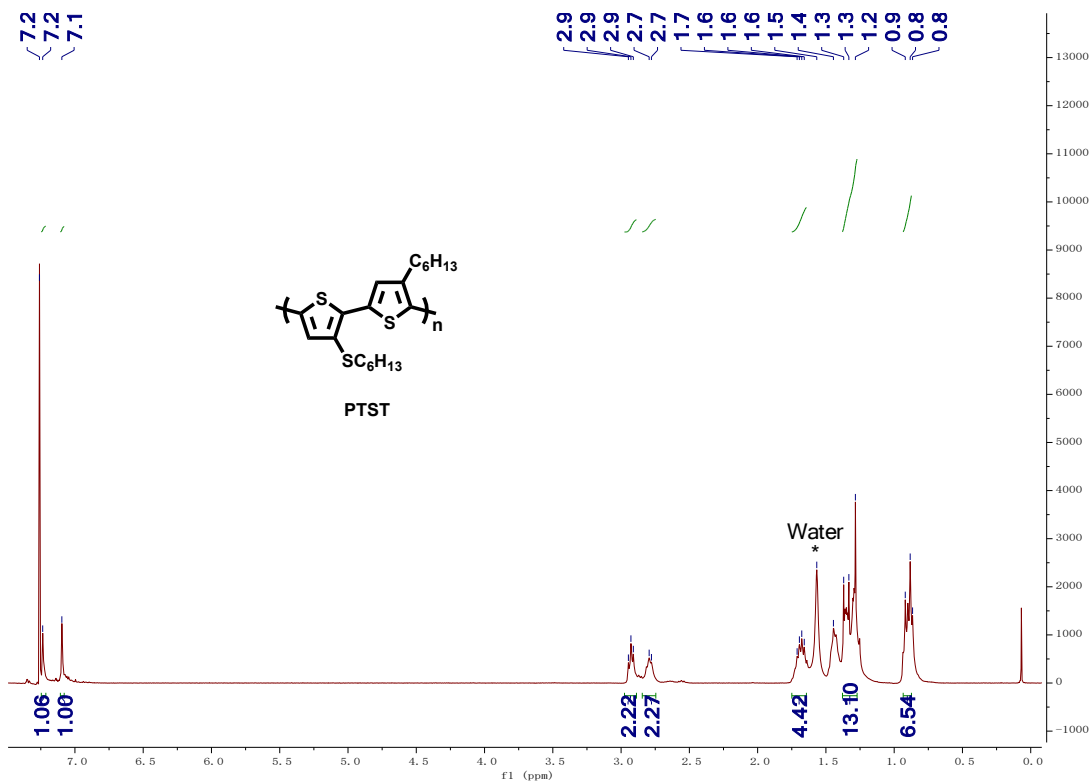

Figure S16. <sup>1</sup>H NMR spectra of polymer PTST.

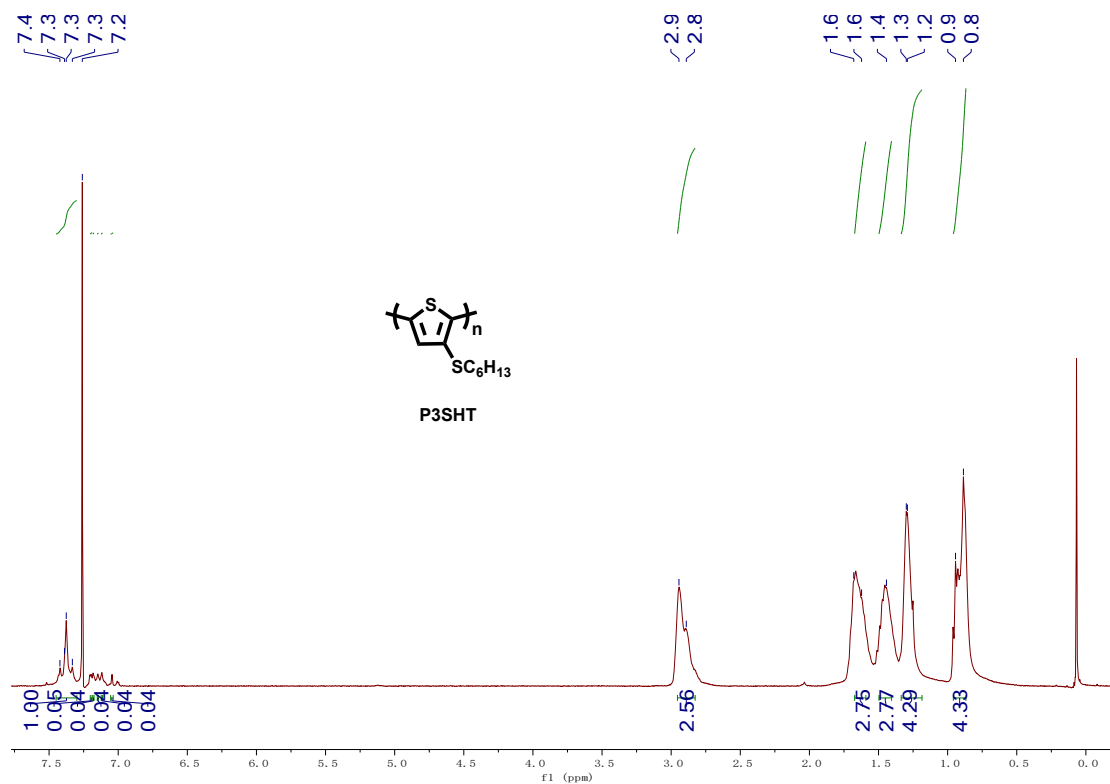

Figure S17. <sup>1</sup>H NMR spectra of polymer P3SHT.

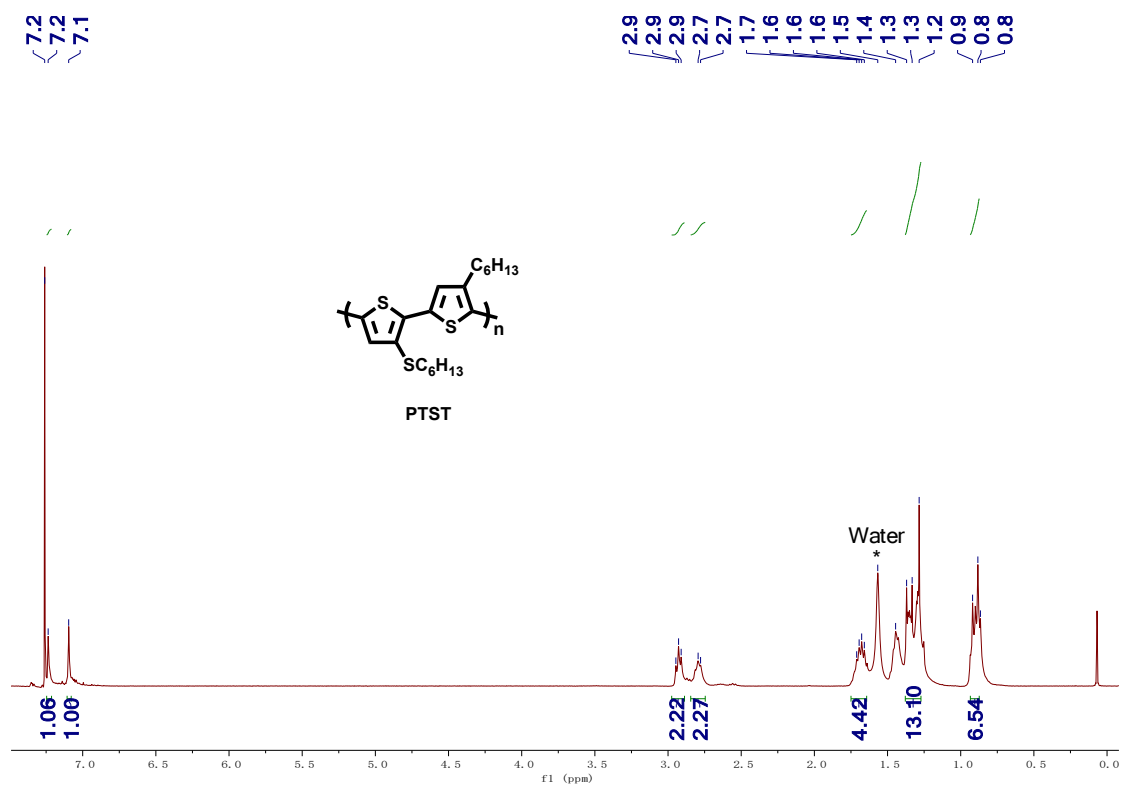

**Figure S18.**  $^1\text{H}$  NMR spectra of polymer P3HT.

**Table S1.** Characteristic length scale of packing phenomenon for neat films of donors.

| Neat  | Lamellar                   |                                    |                               |                         |
|-------|----------------------------|------------------------------------|-------------------------------|-------------------------|
|       | q<br>[ $\text{\AA}^{-1}$ ] | (100) distance<br>[ $\text{\AA}$ ] | FWHM<br>[ $\text{\AA}^{-1}$ ] | CCL<br>[ $\text{\AA}$ ] |
| P3SHT | 0.38                       | 16.5                               | 0.40                          | 15.7                    |
| PTST  | 0.37                       | 17.0                               | 0.063                         | 99.7                    |

## Optimized Geometry Coordinates Data based on DFT Calculation

### Optimized Geometry Coordinates for 8 units P3HT

| Center<br>Number | Atomic<br>Number | Atomic<br>Type | Coordinates (Angstroms) |           |           |
|------------------|------------------|----------------|-------------------------|-----------|-----------|
|                  |                  |                | X                       | Y         | Z         |
| 1                | 6                | 0              | 0.079649                | 0.184198  | -0.000026 |
| 2                | 6                | 0              | 0.340693                | 1.501586  | -0.000010 |
| 3                | 6                | 0              | 1.654944                | 1.763175  | 0.000028  |
| 4                | 6                | 0              | 2.326683                | 0.594470  | 0.000015  |
| 5                | 16               | 0              | 1.365166                | -0.518275 | 0.000012  |
| 6                | 6                | 0              | 3.656880                | 0.345413  | 0.000015  |
| 7                | 6                | 0              | 4.254995                | -0.857112 | 0.000017  |
| 8                | 6                | 0              | 5.591861                | -0.764981 | 0.000043  |
| 9                | 6                | 0              | 5.933192                | 0.538933  | 0.000021  |
| 10               | 16               | 0              | 4.713025                | 1.360233  | 0.000013  |
| 11               | 6                | 0              | 2.228698                | 3.163541  | 0.000034  |
| 12               | 6                | 0              | 1.217695                | 4.323223  | 0.000068  |
| 13               | 6                | 0              | 1.922834                | 5.691214  | -0.000002 |
| 14               | 6                | 0              | 0.919186                | 6.855866  | 0.000019  |
| 15               | 6                | 0              | 1.624103                | 8.221779  | 0.000023  |
| 16               | 6                | 0              | 0.619594                | 9.381733  | 0.000047  |
| 17               | 6                | 0              | 6.512581                | -1.966114 | -0.000038 |
| 18               | 6                | 0              | 5.837780                | -3.348826 | 0.000077  |
| 19               | 6                | 0              | 6.871565                | -4.488705 | 0.000033  |
| 20               | 6                | 0              | 6.200128                | -5.871877 | 0.000073  |
| 21               | 6                | 0              | 7.230942                | -7.012016 | 0.000016  |
| 22               | 6                | 0              | 6.556476                | -8.390314 | 0.000080  |
| 23               | 6                | 0              | 7.151150                | 1.128749  | 0.000055  |
| 24               | 6                | 0              | 7.409860                | 2.446266  | -0.000058 |
| 25               | 6                | 0              | 8.723263                | 2.712198  | 0.000010  |
| 26               | 6                | 0              | 9.399327                | 1.545699  | -0.000067 |
| 27               | 16               | 0              | 8.438762                | 0.430881  | -0.000003 |
| 28               | 6                | 0              | 10.730615               | 1.296376  | -0.000064 |
| 29               | 6                | 0              | 11.309338               | 0.078626  | -0.000036 |
| 30               | 6                | 0              | 12.644709               | 0.161806  | -0.000113 |
| 31               | 6                | 0              | 12.961092               | 1.460159  | -0.000085 |
| 32               | 16               | 0              | 11.785150               | 2.326524  | -0.000040 |
| 33               | 6                | 0              | 9.285959                | 4.117419  | -0.000011 |
| 34               | 6                | 0              | 8.260449                | 5.264799  | 0.000036  |
| 35               | 6                | 0              | 8.940452                | 6.645004  | 0.000032  |
| 36               | 6                | 0              | 7.912265                | 7.788398  | 0.000011  |
| 37               | 6                | 0              | 8.585819                | 9.169800  | 0.000036  |



|    |    |   |            |           |           |
|----|----|---|------------|-----------|-----------|
| 38 | 6  | 0 | 7.554931   | 10.306403 | 0.000040  |
| 39 | 6  | 0 | 13.645737  | -0.962964 | -0.000092 |
| 40 | 6  | 0 | 13.043357  | -2.376414 | 0.000005  |
| 41 | 6  | 0 | 14.131274  | -3.463573 | -0.000074 |
| 42 | 6  | 0 | 13.528472  | -4.878004 | 0.000013  |
| 43 | 6  | 0 | 14.613627  | -5.966451 | -0.000068 |
| 44 | 6  | 0 | 14.007711  | -7.376277 | 0.000054  |
| 45 | 6  | 0 | -6.989654  | -0.790978 | 0.000038  |
| 46 | 6  | 0 | -6.738585  | 0.528331  | -0.000021 |
| 47 | 6  | 0 | -5.426302  | 0.800466  | 0.000020  |
| 48 | 6  | 0 | -4.745328  | -0.362742 | 0.000004  |
| 49 | 16 | 0 | -5.698573  | -1.482365 | 0.000018  |
| 50 | 6  | 0 | -3.413727  | -0.604083 | 0.000029  |
| 51 | 6  | 0 | -2.812935  | -1.805221 | -0.000021 |
| 52 | 6  | 0 | -1.476453  | -1.710599 | -0.000019 |
| 53 | 6  | 0 | -1.138317  | -0.405687 | 0.000013  |
| 54 | 16 | 0 | -2.360104  | 0.413895  | -0.000007 |
| 55 | 6  | 0 | -4.862863  | 2.205011  | -0.000013 |
| 56 | 6  | 0 | -5.884433  | 3.355386  | -0.000012 |
| 57 | 6  | 0 | -5.194097  | 4.730813  | 0.000007  |
| 58 | 6  | 0 | -6.211317  | 5.883760  | 0.000019  |
| 59 | 6  | 0 | -5.523157  | 7.258085  | 0.000000  |
| 60 | 6  | 0 | -6.542163  | 8.405438  | 0.000030  |
| 61 | 6  | 0 | -0.555256  | -2.911653 | 0.000027  |
| 62 | 6  | 0 | -1.229622  | -4.294581 | -0.000017 |
| 63 | 6  | 0 | -0.196058  | -5.434835 | -0.000026 |
| 64 | 6  | 0 | -0.868587  | -6.817372 | -0.000053 |
| 65 | 6  | 0 | 0.160904   | -7.958655 | -0.000096 |
| 66 | 6  | 0 | -0.515704  | -9.335917 | -0.000108 |
| 67 | 6  | 0 | -14.011233 | -1.759104 | -0.000091 |
| 68 | 6  | 0 | -13.800549 | -0.442173 | -0.000117 |
| 69 | 6  | 0 | -12.482641 | -0.196916 | -0.000011 |
| 70 | 6  | 0 | -11.811453 | -1.371677 | -0.000036 |
| 71 | 16 | 0 | -12.759097 | -2.505869 | -0.000003 |
| 72 | 6  | 0 | -10.477965 | -1.609455 | -0.000015 |
| 73 | 6  | 0 | -9.866132  | -2.805509 | 0.000012  |
| 74 | 6  | 0 | -8.530336  | -2.699332 | 0.000008  |
| 75 | 6  | 0 | -8.202236  | -1.392033 | -0.000014 |
| 76 | 16 | 0 | -9.430827  | -0.584412 | 0.000027  |
| 77 | 6  | 0 | -11.908564 | 1.203495  | -0.000066 |
| 78 | 6  | 0 | -12.924109 | 2.359330  | -0.000030 |
| 79 | 6  | 0 | -12.224069 | 3.730026  | -0.000011 |
| 80 | 6  | 0 | -13.232165 | 4.890802  | -0.000007 |
| 81 | 6  | 0 | -12.533242 | 6.259696  | -0.000025 |

|     |   |   |            |            |           |
|-----|---|---|------------|------------|-----------|
| 82  | 6 | 0 | -13.543074 | 7.415080   | -0.000081 |
| 83  | 6 | 0 | -7.595054  | -3.889065  | 0.000030  |
| 84  | 6 | 0 | -8.244311  | -5.283677  | 0.000007  |
| 85  | 6 | 0 | -7.183113  | -6.398671  | 0.000031  |
| 86  | 6 | 0 | -7.816268  | -7.799415  | 0.000056  |
| 87  | 6 | 0 | -6.753087  | -8.909543  | 0.000083  |
| 88  | 6 | 0 | -7.387335  | -10.306684 | 0.000098  |
| 89  | 1 | 0 | -0.422329  | 2.290930   | 0.000065  |
| 90  | 1 | 0 | 3.725657   | -1.818951  | 0.000027  |
| 91  | 1 | 0 | 2.863476   | 3.279179   | 0.910737  |
| 92  | 1 | 0 | 2.863437   | 3.279188   | -0.910663 |
| 93  | 1 | 0 | 0.567532   | 4.257600   | -0.905080 |
| 94  | 1 | 0 | 0.567535   | 4.257670   | 0.905168  |
| 95  | 1 | 0 | 2.579192   | 5.770527   | 0.899186  |
| 96  | 1 | 0 | 2.579246   | 5.770624   | -0.899117 |
| 97  | 1 | 0 | 0.262954   | 6.779396   | -0.899355 |
| 98  | 1 | 0 | 0.262927   | 6.779456   | 0.899379  |
| 99  | 1 | 0 | 2.280341   | 8.304253   | 0.899439  |
| 100 | 1 | 0 | 2.280368   | 8.304193   | -0.899294 |
| 101 | 1 | 0 | 1.144442   | 10.364913  | 0.000081  |
| 102 | 1 | 0 | -0.034467  | 9.346843   | -0.901031 |
| 103 | 1 | 0 | -0.034461  | 9.346884   | 0.901152  |
| 104 | 1 | 0 | 7.155651   | -1.911759  | -0.910479 |
| 105 | 1 | 0 | 7.155703   | -1.911791  | 0.910486  |
| 106 | 1 | 0 | 5.192794   | -3.454016  | 0.905228  |
| 107 | 1 | 0 | 5.192799   | -3.454017  | -0.905093 |
| 108 | 1 | 0 | 7.526180   | -4.396507  | -0.899141 |
| 109 | 1 | 0 | 7.526160   | -4.396537  | 0.899229  |
| 110 | 1 | 0 | 5.546143   | -5.966194  | 0.899375  |
| 111 | 1 | 0 | 5.546102   | -5.966227  | -0.899201 |
| 112 | 1 | 0 | 7.886250   | -6.923825  | -0.899440 |
| 113 | 1 | 0 | 7.886242   | -6.923837  | 0.899504  |
| 114 | 1 | 0 | 7.315188   | -9.206551  | 0.000094  |
| 115 | 1 | 0 | 5.915184   | -8.523874  | 0.901172  |
| 116 | 1 | 0 | 5.915177   | -8.523915  | -0.901011 |
| 117 | 1 | 0 | 6.643852   | 3.232613   | 0.000027  |
| 118 | 1 | 0 | 10.783737  | -0.885862  | -0.000070 |
| 119 | 1 | 0 | 13.988612  | 1.847996   | -0.000114 |
| 120 | 1 | 0 | 9.919192   | 4.239545   | 0.910751  |
| 121 | 1 | 0 | 9.919126   | 4.239558   | -0.910788 |
| 122 | 1 | 0 | 7.611277   | 5.190337   | -0.905255 |
| 123 | 1 | 0 | 7.611325   | 5.190333   | 0.905343  |
| 124 | 1 | 0 | 9.594853   | 6.736795   | 0.899402  |
| 125 | 1 | 0 | 9.594794   | 6.736834   | -0.899385 |

|     |   |   |           |           |           |
|-----|---|---|-----------|-----------|-----------|
| 126 | 1 | 0 | 7.257537  | 7.697828  | -0.899201 |
| 127 | 1 | 0 | 7.257543  | 7.697794  | 0.899308  |
| 128 | 1 | 0 | 9.239829  | 9.266980  | 0.899512  |
| 129 | 1 | 0 | 9.239743  | 9.267022  | -0.899413 |
| 130 | 1 | 0 | 8.056925  | 11.301304 | 0.000055  |
| 131 | 1 | 0 | 6.901781  | 10.256628 | -0.900993 |
| 132 | 1 | 0 | 6.901753  | 10.256602 | 0.901123  |
| 133 | 1 | 0 | 14.294160 | -0.841217 | -0.900036 |
| 134 | 1 | 0 | 14.294252 | -0.841149 | 0.899827  |
| 135 | 1 | 0 | 12.401397 | -2.508855 | 0.903478  |
| 136 | 1 | 0 | 12.401314 | -2.508843 | -0.903513 |
| 137 | 1 | 0 | 14.779894 | -3.338531 | -0.899489 |
| 138 | 1 | 0 | 14.779894 | -3.338473 | 0.899383  |
| 139 | 1 | 0 | 12.879797 | -5.004215 | 0.899415  |
| 140 | 1 | 0 | 12.879737 | -5.004176 | -0.899372 |
| 141 | 1 | 0 | 15.263787 | -5.846263 | -0.899510 |
| 142 | 1 | 0 | 15.263779 | -5.846274 | 0.899435  |
| 143 | 1 | 0 | 14.805792 | -8.154239 | 0.000055  |
| 144 | 1 | 0 | 13.373889 | -7.541295 | 0.901203  |
| 145 | 1 | 0 | 13.373797 | -7.541237 | -0.901033 |
| 146 | 1 | 0 | -7.508412 | 1.311123  | 0.000004  |
| 147 | 1 | 0 | -3.339340 | -2.768568 | -0.000025 |
| 148 | 1 | 0 | -4.228631 | 2.325477  | 0.910383  |
| 149 | 1 | 0 | -4.228572 | 2.325407  | -0.910389 |
| 150 | 1 | 0 | -6.534123 | 3.283469  | -0.905011 |
| 151 | 1 | 0 | -6.534087 | 3.283446  | 0.905013  |
| 152 | 1 | 0 | -4.538751 | 4.817334  | 0.899167  |
| 153 | 1 | 0 | -4.538739 | 4.817296  | -0.899131 |
| 154 | 1 | 0 | -6.866706 | 5.799543  | -0.899305 |
| 155 | 1 | 0 | -6.866673 | 5.799507  | 0.899344  |
| 156 | 1 | 0 | -4.868087 | 7.348630  | 0.899362  |
| 157 | 1 | 0 | -4.868061 | 7.348570  | -0.899371 |
| 158 | 1 | 0 | -6.029774 | 9.395096  | 0.000047  |
| 159 | 1 | 0 | -7.195762 | 8.362323  | -0.901078 |
| 160 | 1 | 0 | -7.195790 | 8.362297  | 0.901038  |
| 161 | 1 | 0 | 0.087601  | -2.857764 | -0.910742 |
| 162 | 1 | 0 | 0.087632  | -2.857843 | 0.910730  |
| 163 | 1 | 0 | -1.874471 | -4.400034 | 0.905174  |
| 164 | 1 | 0 | -1.874493 | -4.400033 | -0.905285 |
| 165 | 1 | 0 | 0.458481  | -5.342838 | -0.899262 |
| 166 | 1 | 0 | 0.458487  | -5.342871 | 0.899248  |
| 167 | 1 | 0 | -1.522727 | -6.911195 | 0.899287  |
| 168 | 1 | 0 | -1.522760 | -6.911159 | -0.899361 |
| 169 | 1 | 0 | 0.816402  | -7.871261 | -0.899459 |

|     |   |   |            |            |           |
|-----|---|---|------------|------------|-----------|
| 170 | 1 | 0 | 0.816368   | -7.871270  | 0.899346  |
| 171 | 1 | 0 | 0.241642   | -10.153433 | -0.000073 |
| 172 | 1 | 0 | -1.157297  | -9.468420  | 0.900990  |
| 173 | 1 | 0 | -1.157269  | -9.468394  | -0.901126 |
| 174 | 1 | 0 | -15.000242 | -2.237000  | -0.000002 |
| 175 | 1 | 0 | -14.608658 | 0.300375   | -0.000036 |
| 176 | 1 | 0 | -10.382260 | -3.774434  | -0.000044 |
| 177 | 1 | 0 | -11.275416 | 1.321896   | 0.911433  |
| 178 | 1 | 0 | -11.275439 | 1.321843   | -0.911411 |
| 179 | 1 | 0 | -13.574302 | 2.290464   | -0.904947 |
| 180 | 1 | 0 | -13.574319 | 2.290446   | 0.904799  |
| 181 | 1 | 0 | -11.568188 | 3.811860   | 0.899173  |
| 182 | 1 | 0 | -11.568168 | 3.811891   | -0.899198 |
| 183 | 1 | 0 | -13.887997 | 4.811611   | -0.899437 |
| 184 | 1 | 0 | -13.888031 | 4.811602   | 0.899368  |
| 185 | 1 | 0 | -11.877491 | 6.344989   | 0.899394  |
| 186 | 1 | 0 | -11.877457 | 6.344998   | -0.899411 |
| 187 | 1 | 0 | -13.022993 | 8.400711   | -0.000026 |
| 188 | 1 | 0 | -14.196955 | 7.377093   | -0.901180 |
| 189 | 1 | 0 | -14.197050 | 7.377095   | 0.901093  |
| 190 | 1 | 0 | -6.953297  | -3.825430  | -0.910990 |
| 191 | 1 | 0 | -6.953280  | -3.825486  | 0.910917  |
| 192 | 1 | 0 | -8.887151  | -5.401772  | 0.905004  |
| 193 | 1 | 0 | -8.887094  | -5.401779  | -0.905038 |
| 194 | 1 | 0 | -6.530792  | -6.290036  | -0.898965 |
| 195 | 1 | 0 | -6.530857  | -6.289993  | 0.899055  |
| 196 | 1 | 0 | -8.467195  | -7.911654  | 0.899510  |
| 197 | 1 | 0 | -8.467188  | -7.911642  | -0.899435 |
| 198 | 1 | 0 | -6.100311  | -8.802619  | -0.899249 |
| 199 | 1 | 0 | -6.100270  | -8.802586  | 0.899327  |
| 200 | 1 | 0 | -6.605408  | -11.100735 | 0.000066  |
| 201 | 1 | 0 | -8.024454  | -10.458594 | 0.901193  |
| 202 | 1 | 0 | -8.024460  | -10.458635 | -0.900990 |

-----

### Optimized Geometry Coordinates for 8 units of P3SHT

| Center<br>Number | Atomic<br>Number | Atomic<br>Type | Coordinates (Angstroms) |           |          |
|------------------|------------------|----------------|-------------------------|-----------|----------|
|                  |                  |                | X                       | Y         | Z        |
| 1                | 6                | 0              | -1.114005               | -0.063768 | 0.281603 |
| 2                | 6                | 0              | -0.680735               | 1.246697  | 0.261559 |
| 3                | 6                | 0              | 0.724725                | 1.433557  | 0.151963 |
| 4                | 6                | 0              | 1.461662                | 0.261656  | 0.089230 |

|    |    |   |           |           |           |
|----|----|---|-----------|-----------|-----------|
| 5  | 16 | 0 | 0.327686  | -1.182293 | 0.156609  |
| 6  | 6  | 0 | 2.864604  | -0.010820 | -0.016517 |
| 7  | 6  | 0 | 3.469827  | -1.247775 | -0.110410 |
| 8  | 6  | 0 | 4.888395  | -1.237907 | -0.214282 |
| 9  | 6  | 0 | 5.460022  | 0.023815  | -0.206367 |
| 10 | 16 | 0 | 4.144259  | 1.295304  | -0.044273 |
| 11 | 16 | 0 | 1.430593  | 3.131798  | 0.143648  |
| 12 | 6  | 0 | 1.467835  | 3.483165  | -1.744543 |
| 13 | 6  | 0 | 1.929525  | 4.921680  | -1.979310 |
| 14 | 6  | 0 | 1.985965  | 5.275531  | -3.479821 |
| 15 | 6  | 0 | 2.449243  | 6.721316  | -3.736231 |
| 16 | 6  | 0 | 2.507294  | 7.087903  | -5.230655 |
| 17 | 16 | 0 | 5.815192  | -2.822586 | -0.315604 |
| 18 | 6  | 0 | 5.932591  | -3.017824 | -2.228680 |
| 19 | 6  | 0 | 6.403108  | -4.426721 | -2.594523 |
| 20 | 6  | 0 | 7.831986  | -4.768687 | -2.132496 |
| 21 | 6  | 0 | 8.296977  | -6.157431 | -2.605957 |
| 22 | 6  | 0 | 9.720581  | -6.514120 | -2.139860 |
| 23 | 6  | 0 | 6.813520  | 0.488963  | -0.292955 |
| 24 | 6  | 0 | 7.240738  | 1.796827  | -0.389085 |
| 25 | 6  | 0 | 8.650598  | 1.985877  | -0.449752 |
| 26 | 6  | 0 | 9.392203  | 0.818551  | -0.405312 |
| 27 | 16 | 0 | 8.263777  | -0.623916 | -0.278141 |
| 28 | 6  | 0 | 10.804220 | 0.544903  | -0.438608 |
| 29 | 6  | 0 | 11.416353 | -0.675138 | -0.247114 |
| 30 | 6  | 0 | 12.844298 | -0.660025 | -0.356888 |
| 31 | 6  | 0 | 13.361089 | 0.573308  | -0.632434 |
| 32 | 16 | 0 | 12.070187 | 1.825701  | -0.781130 |
| 33 | 16 | 0 | 9.337878  | 3.684628  | -0.614356 |
| 34 | 6  | 0 | 9.678386  | 4.102103  | 1.228703  |
| 35 | 6  | 0 | 10.090780 | 5.569645  | 1.346036  |
| 36 | 6  | 0 | 10.396575 | 5.969836  | 2.804221  |
| 37 | 6  | 0 | 10.789523 | 7.451425  | 2.948934  |
| 38 | 6  | 0 | 11.101471 | 7.860973  | 4.400198  |
| 39 | 16 | 0 | 13.776103 | -2.222850 | -0.121634 |
| 40 | 6  | 0 | 15.563220 | -1.636764 | -0.394962 |
| 41 | 6  | 0 | 16.515887 | -2.826060 | -0.248769 |
| 42 | 6  | 0 | 17.987910 | -2.415696 | -0.457967 |
| 43 | 6  | 0 | 18.959023 | -3.603562 | -0.314717 |
| 44 | 6  | 0 | 20.448926 | -3.226910 | -0.454308 |
| 45 | 6  | 0 | -9.050917 | -0.618800 | 0.679399  |
| 46 | 6  | 0 | -8.626666 | 0.678895  | 0.478782  |
| 47 | 6  | 0 | -7.219860 | 0.862884  | 0.381080  |
| 48 | 6  | 0 | -6.473964 | -0.297665 | 0.510113  |

|    |    |   |            |           |           |
|----|----|---|------------|-----------|-----------|
| 49 | 16 | 0 | -7.599361  | -1.727472 | 0.764390  |
| 50 | 6  | 0 | -5.066857  | -0.567776 | 0.474026  |
| 51 | 6  | 0 | -4.451966  | -1.802708 | 0.523746  |
| 52 | 6  | 0 | -3.030930  | -1.790252 | 0.472716  |
| 53 | 6  | 0 | -2.466404  | -0.528411 | 0.373768  |
| 54 | 16 | 0 | -3.794470  | 0.740685  | 0.355653  |
| 55 | 16 | 0 | -6.312884  | 2.434916  | 0.082877  |
| 56 | 6  | 0 | -6.126421  | 3.068358  | 1.886747  |
| 57 | 6  | 0 | -5.334039  | 4.375771  | 1.886345  |
| 58 | 6  | 0 | -5.149212  | 4.937369  | 3.311844  |
| 59 | 6  | 0 | -4.358435  | 6.259654  | 3.330356  |
| 60 | 6  | 0 | -4.098326  | 6.823642  | 4.743193  |
| 61 | 16 | 0 | -2.094927  | -3.372958 | 0.489047  |
| 62 | 6  | 0 | -1.686926  | -3.529422 | 2.360163  |
| 63 | 6  | 0 | -0.922795  | -4.832340 | 2.595687  |
| 64 | 6  | 0 | -0.562917  | -5.034182 | 4.082817  |
| 65 | 6  | 0 | 0.213163   | -6.342544 | 4.327638  |
| 66 | 6  | 0 | 0.537410   | -6.622000 | 5.810292  |
| 67 | 6  | 0 | -16.969617 | -1.195910 | 0.883828  |
| 68 | 6  | 0 | -16.588522 | 0.074755  | 0.580834  |
| 69 | 6  | 0 | -15.165103 | 0.267534  | 0.519364  |
| 70 | 6  | 0 | -14.417860 | -0.866308 | 0.782219  |
| 71 | 16 | 0 | -15.550555 | -2.273003 | 1.126193  |
| 72 | 6  | 0 | -13.004432 | -1.128513 | 0.830892  |
| 73 | 6  | 0 | -12.387008 | -2.337632 | 1.065952  |
| 74 | 6  | 0 | -10.963224 | -2.320147 | 1.052899  |
| 75 | 6  | 0 | -10.403529 | -1.080355 | 0.795964  |
| 76 | 16 | 0 | -11.737917 | 0.162291  | 0.569794  |
| 77 | 16 | 0 | -14.469358 | 1.929489  | 0.161689  |
| 78 | 6  | 0 | -14.317020 | 1.847322  | -1.752077 |
| 79 | 6  | 0 | -13.777040 | 3.181070  | -2.268591 |
| 80 | 6  | 0 | -13.628817 | 3.191166  | -3.804335 |
| 81 | 6  | 0 | -13.072771 | 4.522383  | -4.341931 |
| 82 | 6  | 0 | -12.917901 | 4.545428  | -5.873936 |
| 83 | 16 | 0 | -9.816171  | -3.722114 | 1.368530  |
| 84 | 6  | 0 | -9.630121  | -4.423817 | -0.410433 |
| 85 | 6  | 0 | -8.596721  | -5.550379 | -0.401851 |
| 86 | 6  | 0 | -8.390922  | -6.157371 | -1.805192 |
| 87 | 6  | 0 | -7.348355  | -7.290259 | -1.819757 |
| 88 | 6  | 0 | -7.130516  | -7.901105 | -3.216360 |
| 89 | 6  | 0 | -12.358465 | 5.876305  | -6.401249 |
| 90 | 6  | 0 | -6.086110  | -9.028680 | -3.223089 |
| 91 | 6  | 0 | -5.367524  | 7.271592  | 5.488305  |
| 92 | 6  | 0 | 1.512854   | -5.615672 | 6.444412  |

|     |   |   |           |           |           |
|-----|---|---|-----------|-----------|-----------|
| 93  | 6 | 0 | 10.183136 | -7.898491 | -2.621168 |
| 94  | 6 | 0 | 11.484118 | 9.343241  | 4.537767  |
| 95  | 6 | 0 | 20.848500 | -2.736595 | -1.856702 |
| 96  | 6 | 0 | 2.969267  | 8.532787  | -5.478159 |
| 97  | 1 | 0 | -1.357168 | 2.088339  | 0.338255  |
| 98  | 1 | 0 | 2.911560  | -2.175191 | -0.105349 |
| 99  | 1 | 0 | 2.152683  | 2.759990  | -2.194337 |
| 100 | 1 | 0 | 0.456699  | 3.312416  | -2.123245 |
| 101 | 1 | 0 | 1.249654  | 5.615179  | -1.465755 |
| 102 | 1 | 0 | 2.923582  | 5.065665  | -1.534318 |
| 103 | 1 | 0 | 2.665040  | 4.579125  | -3.993830 |
| 104 | 1 | 0 | 0.991610  | 5.127217  | -3.927494 |
| 105 | 1 | 0 | 1.771818  | 7.417550  | -3.218476 |
| 106 | 1 | 0 | 3.443797  | 6.868839  | -3.288450 |
| 107 | 1 | 0 | 3.184739  | 6.392070  | -5.747117 |
| 108 | 1 | 0 | 1.513490  | 6.938276  | -5.678268 |
| 109 | 1 | 0 | 4.932167  | -2.814262 | -2.617203 |
| 110 | 1 | 0 | 6.627202  | -2.252963 | -2.585783 |
| 111 | 1 | 0 | 5.696073  | -5.165993 | -2.193402 |
| 112 | 1 | 0 | 6.351583  | -4.511434 | -3.691188 |
| 113 | 1 | 0 | 8.526436  | -4.002322 | -2.508242 |
| 114 | 1 | 0 | 7.886242  | -4.722375 | -1.035843 |
| 115 | 1 | 0 | 7.594378  | -6.922067 | -2.239756 |
| 116 | 1 | 0 | 8.254310  | -6.201913 | -3.705454 |
| 117 | 1 | 0 | 10.421311 | -5.746680 | -2.499953 |
| 118 | 1 | 0 | 9.760580  | -6.474244 | -1.041505 |
| 119 | 1 | 0 | 6.557531  | 2.635504  | -0.427877 |
| 120 | 1 | 0 | 10.861971 | -1.577916 | -0.022300 |
| 121 | 1 | 0 | 14.386293 | 0.877405  | -0.763973 |
| 122 | 1 | 0 | 10.469216 | 3.430150  | 1.571172  |
| 123 | 1 | 0 | 8.757716  | 3.893163  | 1.779571  |
| 124 | 1 | 0 | 9.289217  | 6.209083  | 0.951891  |
| 125 | 1 | 0 | 10.977689 | 5.754440  | 0.724424  |
| 126 | 1 | 0 | 9.515696  | 5.764813  | 3.431047  |
| 127 | 1 | 0 | 11.208478 | 5.337625  | 3.193553  |
| 128 | 1 | 0 | 11.666864 | 7.659110  | 2.317311  |
| 129 | 1 | 0 | 9.974978  | 8.082453  | 2.561623  |
| 130 | 1 | 0 | 10.226484 | 7.647268  | 5.031628  |
| 131 | 1 | 0 | 11.918600 | 7.233166  | 4.785074  |
| 132 | 1 | 0 | 15.620443 | -1.201869 | -1.397309 |
| 133 | 1 | 0 | 15.777168 | -0.862693 | 0.348091  |
| 134 | 1 | 0 | 16.398767 | -3.270857 | 0.748548  |
| 135 | 1 | 0 | 16.246633 | -3.603716 | -0.976115 |
| 136 | 1 | 0 | 18.096765 | -1.960547 | -1.452216 |

|     |   |   |            |           |           |
|-----|---|---|------------|-----------|-----------|
| 137 | 1 | 0 | 18.257984  | -1.638437 | 0.273160  |
| 138 | 1 | 0 | 18.800970  | -4.070918 | 0.668344  |
| 139 | 1 | 0 | 18.707938  | -4.369152 | -1.064793 |
| 140 | 1 | 0 | 21.057217  | -4.105288 | -0.197312 |
| 141 | 1 | 0 | 20.696444  | -2.454877 | 0.289483  |
| 142 | 1 | 0 | -9.310785  | 1.514738  | 0.407505  |
| 143 | 1 | 0 | -5.005569  | -2.731093 | 0.582366  |
| 144 | 1 | 0 | -7.134926  | 3.207693  | 2.283765  |
| 145 | 1 | 0 | -5.616955  | 2.283920  | 2.452568  |
| 146 | 1 | 0 | -4.349570  | 4.211862  | 1.427047  |
| 147 | 1 | 0 | -5.852610  | 5.119597  | 1.266264  |
| 148 | 1 | 0 | -6.136808  | 5.084716  | 3.770216  |
| 149 | 1 | 0 | -4.625006  | 4.194037  | 3.931782  |
| 150 | 1 | 0 | -3.393323  | 6.100559  | 2.827255  |
| 151 | 1 | 0 | -4.896928  | 7.012457  | 2.734234  |
| 152 | 1 | 0 | -3.413935  | 7.679267  | 4.658102  |
| 153 | 1 | 0 | -3.569399  | 6.066637  | 5.341139  |
| 154 | 1 | 0 | -1.090306  | -2.656111 | 2.634498  |
| 155 | 1 | 0 | -2.636502  | -3.508653 | 2.901160  |
| 156 | 1 | 0 | -1.525428  | -5.682485 | 2.247463  |
| 157 | 1 | 0 | -0.002317  | -4.829999 | 1.996174  |
| 158 | 1 | 0 | 0.028870   | -4.175828 | 4.429316  |
| 159 | 1 | 0 | -1.484706  | -5.042144 | 4.684409  |
| 160 | 1 | 0 | -0.375758  | -7.181444 | 3.928219  |
| 161 | 1 | 0 | 1.150304   | -6.320704 | 3.750586  |
| 162 | 1 | 0 | 0.964446   | -7.631522 | 5.890129  |
| 163 | 1 | 0 | -0.399490  | -6.639424 | 6.386926  |
| 164 | 1 | 0 | -17.961313 | -1.605642 | 0.993485  |
| 165 | 1 | 0 | -17.284947 | 0.884724  | 0.406927  |
| 166 | 1 | 0 | -12.936880 | -3.253649 | 1.240397  |
| 167 | 1 | 0 | -13.642600 | 1.019910  | -1.985891 |
| 168 | 1 | 0 | -15.312491 | 1.629687  | -2.147957 |
| 169 | 1 | 0 | -14.447646 | 3.995261  | -1.961367 |
| 170 | 1 | 0 | -12.801024 | 3.384316  | -1.807460 |
| 171 | 1 | 0 | -12.965730 | 2.368887  | -4.112087 |
| 172 | 1 | 0 | -14.606801 | 2.991430  | -4.267483 |
| 173 | 1 | 0 | -13.735161 | 5.345183  | -4.032390 |
| 174 | 1 | 0 | -12.095628 | 4.722192  | -3.876094 |
| 175 | 1 | 0 | -12.258133 | 3.721138  | -6.182655 |
| 176 | 1 | 0 | -13.894864 | 4.347408  | -6.338933 |
| 177 | 1 | 0 | -10.615316 | -4.779687 | -0.721866 |
| 178 | 1 | 0 | -9.322723  | -3.593829 | -1.051938 |
| 179 | 1 | 0 | -7.638030  | -5.168104 | -0.025515 |
| 180 | 1 | 0 | -8.917650  | -6.338767 | 0.292702  |



|     |   |   |            |           |           |
|-----|---|---|------------|-----------|-----------|
| 181 | 1 | 0 | -9.350994  | -6.540536 | -2.181913 |
| 182 | 1 | 0 | -8.077378  | -5.365899 | -2.502444 |
| 183 | 1 | 0 | -6.389496  | -6.906742 | -1.438731 |
| 184 | 1 | 0 | -7.661951  | -8.082365 | -1.122623 |
| 185 | 1 | 0 | -8.088742  | -8.285059 | -3.596290 |
| 186 | 1 | 0 | -6.819586  | -7.108356 | -3.912728 |
| 187 | 1 | 0 | -12.257322 | 5.863221  | -7.492546 |
| 188 | 1 | 0 | -13.016244 | 6.713502  | -6.135900 |
| 189 | 1 | 0 | -11.368613 | 6.083975  | -5.975491 |
| 190 | 1 | 0 | -5.952138  | -9.443400 | -4.228787 |
| 191 | 1 | 0 | -5.110182  | -8.664229 | -2.878383 |
| 192 | 1 | 0 | -6.387264  | -9.849460 | -2.559919 |
| 193 | 1 | 0 | -5.117668  | 7.709483  | 6.461702  |
| 194 | 1 | 0 | -6.051126  | 6.434401  | 5.669993  |
| 195 | 1 | 0 | -5.913602  | 8.029351  | 4.911754  |
| 196 | 1 | 0 | 1.749393   | -5.895812 | 7.477499  |
| 197 | 1 | 0 | 1.096773   | -4.601836 | 6.465634  |
| 198 | 1 | 0 | 2.455808   | -5.577666 | 5.884183  |
| 199 | 1 | 0 | 11.197541  | -8.124172 | -2.272531 |
| 200 | 1 | 0 | 9.517922   | -8.688310 | -2.249626 |
| 201 | 1 | 0 | 10.185632  | -7.954633 | -3.717168 |
| 202 | 1 | 0 | 11.700372  | 9.605459  | 5.579840  |
| 203 | 1 | 0 | 12.375135  | 9.577483  | 3.941638  |
| 204 | 1 | 0 | 10.671527  | 9.993687  | 4.190425  |
| 205 | 1 | 0 | 21.924544  | -2.534309 | -1.910129 |
| 206 | 1 | 0 | 20.326371  | -1.812480 | -2.130134 |
| 207 | 1 | 0 | 20.612480  | -3.491381 | -2.617808 |
| 208 | 1 | 0 | 2.998235   | 8.765062  | -6.548987 |
| 209 | 1 | 0 | 2.292795   | 9.250945  | -4.997813 |
| 210 | 1 | 0 | 3.974726   | 8.700373  | -5.072165 |

-----

Optimized Geometry Coordinates for 4 repeat units (8 thiophene rings) of PTST

| Center<br>Number | Atomic<br>Number | Atomic<br>Type | Coordinates (Angstroms) |           |           |
|------------------|------------------|----------------|-------------------------|-----------|-----------|
|                  |                  |                | X                       | Y         | Z         |
| 1                | 6                | 0              | -0.565370               | 0.296247  | 0.269772  |
| 2                | 6                | 0              | -0.231204               | 1.607638  | -0.012727 |
| 3                | 6                | 0              | 1.157579                | 1.920747  | -0.048782 |
| 4                | 6                | 0              | 1.967144                | 0.820260  | 0.219398  |
| 5                | 16               | 0              | 0.953712                | -0.677960 | 0.515293  |
| 6                | 6                | 0              | 3.389283                | 0.664487  | 0.293874  |

|    |    |   |           |           |           |
|----|----|---|-----------|-----------|-----------|
| 7  | 6  | 0 | 4.105600  | -0.485743 | 0.558833  |
| 8  | 6  | 0 | 5.520751  | -0.344657 | 0.582919  |
| 9  | 6  | 0 | 5.988142  | 0.934992  | 0.328194  |
| 10 | 16 | 0 | 4.560282  | 2.049871  | 0.043637  |
| 11 | 6  | 0 | 1.680535  | 3.312940  | -0.352321 |
| 12 | 6  | 0 | 0.605052  | 4.372957  | -0.657056 |
| 13 | 6  | 0 | 1.214855  | 5.750819  | -0.972021 |
| 14 | 6  | 0 | 0.156919  | 6.826113  | -1.278834 |
| 15 | 6  | 0 | 0.761658  | 8.205603  | -1.598478 |
| 16 | 6  | 0 | -0.301756 | 9.273449  | -1.901214 |
| 17 | 16 | 0 | 6.767229  | -1.650059 | 0.938646  |
| 18 | 6  | 0 | 6.945368  | -2.440935 | -0.802030 |
| 19 | 6  | 0 | 7.968351  | -3.575459 | -0.738063 |
| 20 | 6  | 0 | 8.166325  | -4.251342 | -2.110500 |
| 21 | 6  | 0 | 9.177653  | -5.411685 | -2.067729 |
| 22 | 6  | 0 | 9.383933  | -6.090027 | -3.434590 |
| 23 | 6  | 0 | 7.300355  | 1.510145  | 0.250377  |
| 24 | 6  | 0 | 7.621811  | 2.841406  | 0.077358  |
| 25 | 6  | 0 | 9.012103  | 3.161116  | 0.007604  |
| 26 | 6  | 0 | 9.828584  | 2.049522  | 0.133683  |
| 27 | 16 | 0 | 8.833617  | 0.527536  | 0.355118  |
| 28 | 6  | 0 | 11.260449 | 1.886817  | 0.100243  |
| 29 | 6  | 0 | 11.974795 | 0.772222  | -0.274017 |
| 30 | 6  | 0 | 13.398321 | 0.893220  | -0.139319 |
| 31 | 6  | 0 | 13.811718 | 2.101887  | 0.342445  |
| 32 | 16 | 0 | 12.412630 | 3.190502  | 0.677777  |
| 33 | 6  | 0 | 9.471613  | 4.588807  | -0.191384 |
| 34 | 6  | 0 | 9.513640  | 5.414551  | 1.118767  |
| 35 | 6  | 0 | 9.954911  | 6.870291  | 0.887212  |
| 36 | 6  | 0 | 10.005168 | 7.703775  | 2.180498  |
| 37 | 6  | 0 | 10.450797 | 9.159965  | 1.952542  |
| 38 | 6  | 0 | 10.504786 | 9.984572  | 3.248541  |
| 39 | 16 | 0 | 14.751012 | -0.295303 | -0.486314 |
| 40 | 6  | 0 | 13.786401 | -1.766699 | -1.205406 |
| 41 | 6  | 0 | 14.770944 | -2.865085 | -1.614869 |
| 42 | 6  | 0 | 14.053304 | -4.092445 | -2.212609 |
| 43 | 6  | 0 | 15.034569 | -5.205104 | -2.629249 |
| 44 | 6  | 0 | 14.366976 | -6.425202 | -3.297218 |
| 45 | 6  | 0 | -8.442031 | -0.829441 | 0.304890  |
| 46 | 6  | 0 | -8.092959 | 0.470003  | -0.010420 |
| 47 | 6  | 0 | -6.700566 | 0.767589  | -0.048183 |
| 48 | 6  | 0 | -5.904123 | -0.334136 | 0.251975  |
| 49 | 16 | 0 | -6.935148 | -1.813121 | 0.583271  |
| 50 | 6  | 0 | -4.484388 | -0.502542 | 0.337729  |

|    |    |   |            |           |           |
|----|----|---|------------|-----------|-----------|
| 51 | 6  | 0 | -3.781005  | -1.651427 | 0.641873  |
| 52 | 6  | 0 | -2.365036  | -1.526159 | 0.663497  |
| 53 | 6  | 0 | -1.881795  | -0.260195 | 0.366822  |
| 54 | 16 | 0 | -3.297770  | 0.861065  | 0.045157  |
| 55 | 6  | 0 | -6.161851  | 2.146519  | -0.383048 |
| 56 | 6  | 0 | -7.225609  | 3.214114  | -0.702424 |
| 57 | 6  | 0 | -6.600324  | 4.578934  | -1.042757 |
| 58 | 6  | 0 | -7.646414  | 5.662538  | -1.360906 |
| 59 | 6  | 0 | -7.026136  | 7.029151  | -1.705088 |
| 60 | 6  | 0 | -8.077690  | 8.105865  | -2.017720 |
| 61 | 16 | 0 | -1.319299  | -2.994892 | 1.025728  |
| 62 | 6  | 0 | -1.080861  | -2.795145 | 2.920744  |
| 63 | 6  | 0 | -0.226925  | -3.951387 | 3.442021  |
| 64 | 6  | 0 | -0.013005  | -3.873167 | 4.968072  |
| 65 | 6  | 0 | 0.861436   | -5.024949 | 5.500856  |
| 66 | 6  | 0 | 1.041787   | -5.029975 | 7.033306  |
| 67 | 6  | 0 | -16.306116 | -1.862675 | 0.269892  |
| 68 | 6  | 0 | -15.977584 | -0.590217 | -0.088840 |
| 69 | 6  | 0 | -14.565722 | -0.305052 | -0.110011 |
| 70 | 6  | 0 | -13.789544 | -1.400367 | 0.245091  |
| 71 | 16 | 0 | -14.852780 | -2.848109 | 0.623184  |
| 72 | 6  | 0 | -12.368520 | -1.585712 | 0.360343  |
| 73 | 6  | 0 | -11.684060 | -2.727297 | 0.717823  |
| 74 | 6  | 0 | -10.264787 | -2.617085 | 0.749384  |
| 75 | 6  | 0 | -9.765779  | -1.369853 | 0.408965  |
| 76 | 16 | 0 | -11.165992 | -0.248043 | 0.027452  |
| 77 | 6  | 0 | -14.005811 | 1.055101  | -0.485073 |
| 78 | 6  | 0 | -15.055242 | 2.125632  | -0.841092 |
| 79 | 6  | 0 | -14.412253 | 3.474225  | -1.211574 |
| 80 | 6  | 0 | -15.443845 | 4.561349  | -1.563440 |
| 81 | 6  | 0 | -14.805711 | 5.911909  | -1.937096 |
| 82 | 6  | 0 | -15.842835 | 6.992556  | -2.282645 |
| 83 | 16 | 0 | -9.054315  | -3.915050 | 1.228704  |
| 84 | 6  | 0 | -8.796772  | -4.798855 | -0.457096 |
| 85 | 6  | 0 | -7.819943  | -5.959691 | -0.267183 |
| 86 | 6  | 0 | -7.546456  | -6.710519 | -1.586622 |
| 87 | 6  | 0 | -6.588247  | -7.902621 | -1.407930 |
| 88 | 6  | 0 | -6.301160  | -8.657517 | -2.718844 |
| 89 | 6  | 0 | -5.352826  | -9.852227 | -2.529077 |
| 90 | 6  | 0 | 1.829884   | -3.827432 | 7.580448  |
| 91 | 6  | 0 | 10.389024  | -7.251881 | -3.384380 |
| 92 | 6  | 0 | 13.448597  | -7.234078 | -2.364848 |
| 93 | 1  | 0 | -0.991929  | 2.354207  | -0.196204 |
| 94 | 1  | 0 | 3.631297   | -1.442875 | 0.732744  |

|     |   |   |           |           |           |
|-----|---|---|-----------|-----------|-----------|
| 95  | 1 | 0 | 2.287412  | 3.666834  | 0.494349  |
| 96  | 1 | 0 | 2.368683  | 3.261729  | -1.208791 |
| 97  | 1 | 0 | -0.005508 | 4.045885  | -1.510816 |
| 98  | 1 | 0 | -0.076338 | 4.468788  | 0.200534  |
| 99  | 1 | 0 | 1.830882  | 6.079872  | -0.121207 |
| 100 | 1 | 0 | 1.898094  | 5.658492  | -1.829942 |
| 101 | 1 | 0 | -0.460926 | 6.496368  | -2.128282 |
| 102 | 1 | 0 | -0.525647 | 6.920523  | -0.420155 |
| 103 | 1 | 0 | 1.380812  | 8.533721  | -0.750464 |
| 104 | 1 | 0 | 1.442425  | 8.111043  | -2.457276 |
| 105 | 1 | 0 | 0.157186  | 10.243626 | -2.123947 |
| 106 | 1 | 0 | -0.913609 | 8.986186  | -2.765610 |
| 107 | 1 | 0 | -0.976667 | 9.410406  | -1.046883 |
| 108 | 1 | 0 | 7.257292  | -1.647781 | -1.485784 |
| 109 | 1 | 0 | 5.956908  | -2.806824 | -1.091673 |
| 110 | 1 | 0 | 8.931443  | -3.186299 | -0.379977 |
| 111 | 1 | 0 | 7.637571  | -4.325208 | -0.006717 |
| 112 | 1 | 0 | 7.198288  | -4.626795 | -2.474306 |
| 113 | 1 | 0 | 8.503411  | -3.501212 | -2.841798 |
| 114 | 1 | 0 | 10.145168 | -5.038604 | -1.698364 |
| 115 | 1 | 0 | 8.838089  | -6.162499 | -1.338192 |
| 116 | 1 | 0 | 8.415517  | -6.457885 | -3.804564 |
| 117 | 1 | 0 | 9.725659  | -5.339305 | -4.162556 |
| 118 | 1 | 0 | 6.860989  | 3.608320  | -0.014438 |
| 119 | 1 | 0 | 11.496781 | -0.119334 | -0.660520 |
| 120 | 1 | 0 | 14.806880 | 2.473522  | 0.520250  |
| 121 | 1 | 0 | 10.461359 | 4.609172  | -0.660460 |
| 122 | 1 | 0 | 8.784707  | 5.082039  | -0.893347 |
| 123 | 1 | 0 | 8.519102  | 5.399237  | 1.587687  |
| 124 | 1 | 0 | 10.198109 | 4.931264  | 1.829281  |
| 125 | 1 | 0 | 10.948192 | 6.876557  | 0.412968  |
| 126 | 1 | 0 | 9.268819  | 7.349951  | 0.171810  |
| 127 | 1 | 0 | 9.012229  | 7.698970  | 2.656155  |
| 128 | 1 | 0 | 10.690525 | 7.223303  | 2.895480  |
| 129 | 1 | 0 | 11.441375 | 9.163004  | 1.473992  |
| 130 | 1 | 0 | 9.764380  | 9.640339  | 1.239558  |
| 131 | 1 | 0 | 10.827241 | 11.014225 | 3.054800  |
| 132 | 1 | 0 | 9.519861  | 10.027305 | 3.730475  |
| 133 | 1 | 0 | 11.207027 | 9.543374  | 3.967140  |
| 134 | 1 | 0 | 13.093504 | -2.121136 | -0.436356 |
| 135 | 1 | 0 | 13.216885 | -1.400675 | -2.064968 |
| 136 | 1 | 0 | 15.482914 | -2.464587 | -2.348894 |
| 137 | 1 | 0 | 15.358817 | -3.175700 | -0.740554 |
| 138 | 1 | 0 | 13.334084 | -4.482298 | -1.478863 |

|     |   |   |            |           |           |
|-----|---|---|------------|-----------|-----------|
| 139 | 1 | 0 | 13.466835  | -3.780967 | -3.090548 |
| 140 | 1 | 0 | 15.773870  | -4.779933 | -3.323835 |
| 141 | 1 | 0 | 15.598441  | -5.540296 | -1.745201 |
| 142 | 1 | 0 | 15.154933  | -7.087152 | -3.682664 |
| 143 | 1 | 0 | 13.794718  | -6.087668 | -4.174195 |
| 144 | 1 | 0 | -8.844834  | 1.219890  | -0.215512 |
| 145 | 1 | 0 | -4.266638  | -2.597419 | 0.843452  |
| 146 | 1 | 0 | -5.545817  | 2.509562  | 0.453004  |
| 147 | 1 | 0 | -5.479339  | 2.069677  | -1.242181 |
| 148 | 1 | 0 | -7.843246  | 2.880217  | -1.548420 |
| 149 | 1 | 0 | -7.902573  | 3.332620  | 0.155821  |
| 150 | 1 | 0 | -5.975634  | 4.913683  | -0.200531 |
| 151 | 1 | 0 | -5.922954  | 4.464491  | -1.902676 |
| 152 | 1 | 0 | -8.272983  | 5.327520  | -2.201862 |
| 153 | 1 | 0 | -8.323009  | 5.778765  | -0.500205 |
| 154 | 1 | 0 | -6.397706  | 7.362092  | -0.865828 |
| 155 | 1 | 0 | -6.351854  | 6.912895  | -2.566339 |
| 156 | 1 | 0 | -7.607755  | 9.066593  | -2.257765 |
| 157 | 1 | 0 | -8.698375  | 7.813562  | -2.874095 |
| 158 | 1 | 0 | -8.745607  | 8.264320  | -1.161623 |
| 159 | 1 | 0 | -0.595793  | -1.829703 | 3.084454  |
| 160 | 1 | 0 | -2.075990  | -2.786019 | 3.373044  |
| 161 | 1 | 0 | -0.705426  | -4.907733 | 3.189744  |
| 162 | 1 | 0 | 0.748015   | -3.942664 | 2.935855  |
| 163 | 1 | 0 | 0.445776   | -2.906549 | 5.218274  |
| 164 | 1 | 0 | -0.989730  | -3.896103 | 5.475166  |
| 165 | 1 | 0 | 0.411729   | -5.980218 | 5.192428  |
| 166 | 1 | 0 | 1.850749   | -4.980335 | 5.020214  |
| 167 | 1 | 0 | 1.558001   | -5.956162 | 7.322187  |
| 168 | 1 | 0 | 0.051950   | -5.068795 | 7.512258  |
| 169 | 1 | 0 | -17.281687 | -2.314335 | 0.357764  |
| 170 | 1 | 0 | -16.726801 | 0.148246  | -0.339862 |
| 171 | 1 | 0 | -12.182358 | -3.658591 | 0.953993  |
| 172 | 1 | 0 | -13.389554 | 1.436797  | 0.342423  |
| 173 | 1 | 0 | -13.320343 | 0.944830  | -1.338408 |
| 174 | 1 | 0 | -15.670226 | 1.777024  | -1.683095 |
| 175 | 1 | 0 | -15.737266 | 2.273556  | 0.008467  |
| 176 | 1 | 0 | -13.789142 | 3.822846  | -0.373831 |
| 177 | 1 | 0 | -13.730713 | 3.330683  | -2.063835 |
| 178 | 1 | 0 | -16.068983 | 4.212904  | -2.400005 |
| 179 | 1 | 0 | -16.124439 | 4.706502  | -0.710330 |
| 180 | 1 | 0 | -14.178446 | 6.258037  | -1.102317 |
| 181 | 1 | 0 | -14.127729 | 5.766792  | -2.791050 |
| 182 | 1 | 0 | -15.360271 | 7.941361  | -2.544056 |

|     |   |   |            |            |           |
|-----|---|---|------------|------------|-----------|
| 183 | 1 | 0 | -16.462237 | 6.686032   | -3.134948 |
| 184 | 1 | 0 | -16.513534 | 7.180413   | -1.434735 |
| 185 | 1 | 0 | -9.777388  | -5.147635  | -0.790077 |
| 186 | 1 | 0 | -8.414898  | -4.053766  | -1.159845 |
| 187 | 1 | 0 | -6.872026  | -5.582536  | 0.140711  |
| 188 | 1 | 0 | -8.226624  | -6.660877  | 0.474159  |
| 189 | 1 | 0 | -8.498202  | -7.069021  | -2.006529 |
| 190 | 1 | 0 | -7.124890  | -6.011571  | -2.324541 |
| 191 | 1 | 0 | -5.638975  | -7.545796  | -0.980027 |
| 192 | 1 | 0 | -7.013485  | -8.602436  | -0.672358 |
| 193 | 1 | 0 | -7.250928  | -9.007218  | -3.149939 |
| 194 | 1 | 0 | -5.870345  | -7.958992  | -3.451323 |
| 195 | 1 | 0 | -5.165792  | -10.369010 | -3.477462 |
| 196 | 1 | 0 | -4.384483  | -9.527385  | -2.128174 |
| 197 | 1 | 0 | -5.774666  | -10.582504 | -1.827090 |
| 198 | 1 | 0 | 1.970259   | -3.909640  | 8.664569  |
| 199 | 1 | 0 | 1.314305   | -2.879938  | 7.386134  |
| 200 | 1 | 0 | 2.823811   | -3.767453  | 7.118564  |
| 201 | 1 | 0 | 10.516667  | -7.713202  | -4.370527 |
| 202 | 1 | 0 | 11.374180  | -6.906897  | -3.046013 |
| 203 | 1 | 0 | 10.054044  | -8.032768  | -2.690215 |
| 204 | 1 | 0 | 13.046188  | -8.115180  | -2.878063 |
| 205 | 1 | 0 | 12.596600  | -6.639862  | -2.014868 |
| 206 | 1 | 0 | 13.997337  | -7.584091  | -1.481118 |

---

1. Di Maria, F.; Olivelli, P.; Gazzano, M.; Zanelli, A.; Biasiucci, M.; Gigli, G.; Gentili, D.; D'Angelo, P.; Cavallini, M.; Barbarella, G., A successful chemical strategy to induce oligothiophene self-assembly into fibers with tunable shape and function. *J. Am. Chem. Soc.* **2011**, *133* (22), 8654-61.
2. DeFrancisco, J. R.; López-Espejo, G.; Zafra, J. L.; Yadav, S.; Messersmith, R. E.; Gómez-García, C. J.; Ottosson, H.; Casado, J.; Tovar, J. D., Torsional Bias as a Strategy To Tune Singlet-Triplet Gaps in Organic Diradicals. *J. Phys. Chem. C* **2018**, *122* (23), 12148-12157.
